# Supplementary material for: TRIM21-mediated ubiquitination of PARP1 suppresses small cell lung cancer progression through the PI3K/AKT/STAT5A axis
Source: Research Square preprint supplement (doi:10.21203/rs.3.rs-5464073/v1), 2024-12-05
Supplement: Supplementary file 1 [file 430dca2aed57f77a889de48d.xlsx]

## Sheet: Sheet1
Table S3. Oligos used in the study
Name	Sequences (5’-3’)	Discription
TRIM21-shRNA #1	GCGCTTTCTGCTCAAGAATCT	For knockdown of TRIM21
TRIM21-shRNA #2	GCTCCCTCATCTACTCCTTCT
PARP1-shRNA #1	CCGAGAAATCTCTTACCTCAA	For knockdown of PARP1
PARP1-shRNA #2	CTTCGTTAGAATGTCTGCCTT
Control-shRNA	TACGCCACCAATTTCGTTTCA	For control of shRNA
TRIM21-siRNA #1	GCTAGCCAACATGGTGAACAA	For knockdown of TRIM21
TRIM21-siRNA #2	GCTGCAGGAGGTGATAATTGT
PARP1-siRNA #1	CCGAGAAATCTCTTACCTCAA	For knockdown of PARP1
PARP1-siRNA #2	ACGGTGATCGGTAGCAACAAA
SIX5-siRNA #1	CAGTGGACAAGTATCGACTGCGCAA	For knockdown of SIX5
SIX5-siRNA #2	CCTGCCAATGTGCACCTCATCAACT
TCF21-siRNA #1	TCAGCGATGTGGAGGACCTTCAAGA	For knockdown of TCF21
TCF21-siRNA #2	GGAGATGTTGGAATGTGACGGGTTG
STAT5A-siRNA #1	ACTTGGCCCAGTGGATTGAGA	For knockdown of STAT5A
STAT5A-siRNA #2	GCGCTTTAGTGACTCAGAA
Control-siRNA	TTCTCCGAACGTGTCACGT	For control of siRNA
TRIM21-F	AGTCCCCTGTAAAGCCAAACC	For RT-qPCR of TRIM21
TRIM21-R	CGATTGGGCCGGAGATTCTT
SIX5-F	TCACGCAGGTCAGCAACTGGTT	For RT-qPCR of SIX5
SIX5-R	TCTCTCCAGGTCCTCAGGACTT
TCF21-F	CACTTGAGGCAGATCCTGGCTA	For RT-qPCR of TCF21
TCF21-R	CGGTCACCACTTCTTTCAGGTC
STAT5A-F	GCAGAGTCCGTGACAGAGG	For RT-qPCR of STAT5A
STAT5A-R	CCACAGGTAGGGACAGAGTCT
β-Actin-F	TCCCTGGAGAAGAGCTACGA	For RT-qPCR of β-Actin
β-Actin-R	AGCACTGTGTTGGCGTACAG
ChIP-TRIM21-F1	CCCACAGAATTGGAGTAAATA	For ChIP-PCR of TRIM21
ChIP-TRIM21-R1	CATTTGCCACTTGTATGTCT
ChIP-TRIM21-F2	CAAAGAACTCAAACAACTCTATAGG
ChIP-TRIM21-R2	ATTTCTCTGATGATCAGTGGTG
ChIP-TRIM21-F3	GAGCTACCATGTAATCTAGCAATCC
ChIP-TRIM21-R3	GATAAACATGGGAGTGCAGATATCT
ChIP-TRIM21-F4	AGGACCACGGGCTACTGAGTT
ChIP-TRIM21-R4	AGAAGAGAAGTCAGAGTTGAGCTGG
ChIP-TRIM21-F5	CCTTTCCTCTCAGACTTGCTTCTG
ChIP-TRIM21-R5	GTCCCTTGATCTAGTGGGGTTC
ChIP-TRIM21-F0	AGCTCAGTGACAAGAACACA
ChIP-TRIM21-R0	TTTAACGCCTGCAGGTGAGT
