# Supplementary material for: TRIM21-mediated ubiquitination of PARP1 suppresses small cell lung cancer progression through the PI3K/AKT/STAT5A axis
Source: Research Square preprint supplement (doi:10.21203/rs.3.rs-5464073/v1), 2024-12-05
Supplement: Supplementary file 2 [file 858288457f3f995b878e6c65.xlsx]

## Sheet: 293T-IgG_293T-PARP1
Table S1. PARP1-associated proteins identified by label-free quantitative mass spectrometry in HEK293T cells
Protein IDs	Majority protein IDs	Protein names	Gene names	Fasta headers	Number of proteins	Peptides	Razor + unique peptides	Unique peptides	Sequence coverage [%]	Mol. weight [kDa]	Sequence length	Score	Peptides 293T-IgG	Peptides 293T-PARP1	Razor + unique peptides 293T-IgG	Razor + unique peptides 293T-PARP1	Unique peptides 293T-IgG	Unique peptides 293T-PARP1	Sequence coverage 293T-IgG [%]	Sequence coverage 293T-PARP1 [%]	Intensity	Intensity 293T-IgG	Intensity 293T-PARP1	iBAQ	iBAQ 293T-IgG	iBAQ 293T-PARP1
P09874	P09874	Poly [ADP-ribose] polymerase 1	PARP1	sp|P09874|PARP1_HUMAN Poly [ADP-ribose] polymerase 1 OS=Homo sapiens OX=9606 GN=PARP1 PE=1 SV=4	1	108	108	108	84.1	113.08	1014	323.31	0	108	0	108	0	108	0	84.1	84454000000	0	84454000000	1340500000	0	1340500000
Q08379	Q08379	Golgin subfamily A member 2	GOLGA2	sp|Q08379|GOGA2_HUMAN Golgin subfamily A member 2 OS=Homo sapiens OX=9606 GN=GOLGA2 PE=1 SV=3	1	27	27	27	31.7	113.08	1002	323.31	0	27	0	27	0	27	0	31.7	1513000000	0	1513000000	25644000	0	25644000
P62805	P62805	Histone H4	H4-16	sp|P62805|H4_HUMAN Histone H4 OS=Homo sapiens OX=9606 GN=H4-16 PE=1 SV=2	1	17	17	17	62.1	11.367	103	323.31	6	17	6	17	6	17	56.3	62.1	12844000000	273080000	12571000000	2140700000	45513000	2095200000
P12268	P12268	Inosine-5-monophosphate dehydrogenase 2	IMPDH2	sp|P12268|IMDH2_HUMAN Inosine-5-monophosphate dehydrogenase 2 OS=Homo sapiens OX=9606 GN=IMPDH2 PE=1 SV=2	1	17	17	17	45.7	55.804	514	257.78	0	17	0	17	0	17	0	45.7	893260000	0	893260000	34356000	0	34356000
P49916	P49916	DNA ligase 3	LIG3	sp|P49916|DNLI3_HUMAN DNA ligase 3 OS=Homo sapiens OX=9606 GN=LIG3 PE=1 SV=2	1	12	12	12	15.8	112.91	1009	184.46	0	12	0	12	0	12	0	15.8	173210000	0	173210000	2510300	0	2510300
P28799	P28799	Progranulin	GRN	sp|P28799|GRN_HUMAN Progranulin OS=Homo sapiens OX=9606 GN=GRN PE=1 SV=2	1	13	13	13	29.7	63.544	593	323.31	8	10	8	10	8	10	19.9	28.2	7996500000	2796900000	5199500000	347670000	121610000	226070000
P19474	P19474	E3 ubiquitin-protein ligase TRIM21	TRIM21	sp|P19474|RO52_HUMAN E3 ubiquitin-protein ligase TRIM21 OS=Homo sapiens OX=9606 GN=TRIM21 PE=1 SV=1	1	10	10	10	23.4	54.169	475	323.31	2	9	7	9	7	9	17.5	20.4	1089000000	310740000	778230000	36299000	10358000	25941000
O75531	O75531	Barrier-to-autointegration factor	BANF1	sp|O75531|BAF_HUMAN Barrier-to-autointegration factor OS=Homo sapiens OX=9606 GN=BANF1 PE=1 SV=1	1	9	9	9	85.4	10.058	89	84.48	0	9	0	9	0	9	0	85.4	320100000	0	320100000	40013000	0	40013000
P38646	P38646	Stress-70 protein, mitochondrial	HSPA9	sp|P38646|GRP75_HUMAN Stress-70 protein, mitochondrial OS=Homo sapiens OX=9606 GN=HSPA9 PE=1 SV=2	1	11	11	11	18.3	73.68	679	76.889	4	9	4	9	4	9	5.6	16.2	346510000	67087000	279420000	8058300	1560200	6498100
O94788	O94788	Retinal dehydrogenase 2	ALDH1A2	sp|O94788|AL1A2_HUMAN Retinal dehydrogenase 2 OS=Homo sapiens OX=9606 GN=ALDH1A2 PE=1 SV=3	1	8	8	8	20.5	56.723	518	71.099	0	8	0	8	0	8	0	20.5	159640000	0	159640000	5504800	0	5504800
P62280	P62280	40S ribosomal protein S11	RPS11	sp|P62280|RS11_HUMAN 40S ribosomal protein S11 OS=Homo sapiens OX=9606 GN=RPS11 PE=1 SV=3	1	9	9	9	54.4	18.431	158	140.84	6	7	6	7	6	7	46.8	53.2	617820000	383160000	234660000	61782000	38316000	23466000
Q9UHI6	Q9UHI6	Probable ATP-dependent RNA helicase DDX20	DDX20	sp|Q9UHI6|DDX20_HUMAN Probable ATP-dependent RNA helicase DDX20 OS=Homo sapiens OX=9606 GN=DDX20 PE=1 SV=2	1	7	7	7	13.7	92.239	824	66.896	0	7	0	7	0	7	0	13.7	148650000	0	148650000	2858700	0	2858700
Q86WJ1	Q86WJ1	Chromodomain-helicase-DNA-binding protein 1-like	CHD1L	sp|Q86WJ1|CHD1L_HUMAN Chromodomain-helicase-DNA-binding protein 1-like OS=Homo sapiens OX=9606 GN=CHD1L PE=1 SV=3	1	7	7	7	10.7	101	897	50.139	0	7	0	7	0	7	0	10.7	181550000	0	181550000	3242000	0	3242000
Q16637	Q16637	Survival motor neuron protein	SMN2	sp|Q16637|SMN_HUMAN Survival motor neuron protein OS=Homo sapiens OX=9606 GN=SMN2 PE=1 SV=1	1	6	6	6	27.6	31.848	294	193.37	0	6	0	6	0	6	0	27.6	334890000	0	334890000	37210000	0	37210000
Q9Y3F4	Q9Y3F4	Serine-threonine kinase receptor-associated protein	STRAP	sp|Q9Y3F4|STRAP_HUMAN Serine-threonine kinase receptor-associated protein OS=Homo sapiens OX=9606 GN=STRAP PE=1 SV=1	1	6	6	6	21.1	38.438	350	88.991	0	6	0	6	0	6	0	21.1	112320000	0	112320000	4680000	0	4680000
P26373	P26373	60S ribosomal protein L13	RPL13	sp|P26373|RL13_HUMAN 60S ribosomal protein L13 OS=Homo sapiens OX=9606 GN=RPL13 PE=1 SV=4	1	8	8	8	32.2	24.261	211	81.379	5	6	5	6	5	6	24.2	26.1	418060000	297270000	120780000	32158000	22867000	9291100
Q8WXD5	Q8WXD5	Gem-associated protein 6	GEMIN6	sp|Q8WXD5|GEMI6_HUMAN Gem-associated protein 6 OS=Homo sapiens OX=9606 GN=GEMIN6 PE=1 SV=1	1	6	6	6	25.1	18.824	167	63.169	0	6	0	6	0	6	0	25.1	376920000	0	376920000	47115000	0	47115000
Q9H840	Q9H840	Gem-associated protein 7	GEMIN7	sp|Q9H840|GEMI7_HUMAN Gem-associated protein 7 OS=Homo sapiens OX=9606 GN=GEMIN7 PE=1 SV=1	1	5	5	5	72.5	14.536	131	95.572	0	5	0	5	0	5	0	72.5	130120000	0	130120000	21686000	0	21686000
Q6FI13;Q16777;P0C0S8;Q99878;Q9BTM1;Q96KK5;P20671	Q6FI13;Q16777;P0C0S8;Q99878;Q9BTM1;Q96KK5;P20671	Histone H2A type 2-A;Histone H2A type 2-C;Histone H2A type 1	H2AC19;H2AC20;H2AC17	sp|Q6FI13|H2A2A_HUMAN Histone H2A type 2-A OS=Homo sapiens OX=9606 GN=H2AC19 PE=1 SV=3;sp|Q16777|H2A2C_HUMAN Histone H2A type 2-C OS=Homo sapiens OX=9606 GN=H2AC20 PE=1 SV=4;sp|P0C0S8|H2A1_HUMAN Histone H2A type 1 OS=Homo sapiens OX=9606 GN=H2AC17 PE=1 SV=	7	9	9	5	70.8	14.095	130	87.6	1	9	1	9	0	5	6.9	70.8	4658300000	261050000	4397200000	665470000	37293000	628170000
P62888	P62888	60S ribosomal protein L30	RPL30	sp|P62888|RL30_HUMAN 60S ribosomal protein L30 OS=Homo sapiens OX=9606 GN=RPL30 PE=1 SV=2	1	5	5	5	51.3	12.784	115	58.396	1	5	1	5	1	5	10.4	51.3	106560000	33608000	72953000	13320000	4200900	9119100
P62266	P62266	40S ribosomal protein S23	RPS23	sp|P62266|RS23_HUMAN 40S ribosomal protein S23 OS=Homo sapiens OX=9606 GN=RPS23 PE=1 SV=3	1	7	7	7	51	15.807	143	55.72	7	5	7	5	7	5	51	50.3	935060000	574800000	360270000	116880000	71850000	45033000
P08670;P07197;P17661;Q16352	P08670	Vimentin	VIM	sp|P08670|VIME_HUMAN Vimentin OS=Homo sapiens OX=9606 GN=VIM PE=1 SV=4	4	7	7	7	17.2	53.651	466	54.201	5	5	5	5	5	5	11.6	14.2	198900000	118750000	80154000	5682800	3392700	2290100
Q00839	Q00839	Heterogeneous nuclear ribonucleoprotein U	HNRNPU	sp|Q00839|HNRPU_HUMAN Heterogeneous nuclear ribonucleoprotein U OS=Homo sapiens OX=9606 GN=HNRNPU PE=1 SV=6	1	5	5	5	9.2	90.583	825	220.98	3	4	3	4	3	4	5.1	7.5	198680000	79953000	118730000	4054700	1631700	2423000
P62314	P62314	Small nuclear ribonucleoprotein Sm D1	SNRPD1	sp|P62314|SMD1_HUMAN Small nuclear ribonucleoprotein Sm D1 OS=Homo sapiens OX=9606 GN=SNRPD1 PE=1 SV=1	1	4	4	4	49.6	13.281	119	173.39	0	4	0	4	0	4	0	49.6	248240000	0	248240000	49647000	0	49647000
P46778	P46778	60S ribosomal protein L21	RPL21	sp|P46778|RL21_HUMAN 60S ribosomal protein L21 OS=Homo sapiens OX=9606 GN=RPL21 PE=1 SV=2	1	5	5	5	33.1	18.565	160	151.74	4	4	4	4	4	4	33.1	25	656430000	288980000	367450000	82054000	36123000	45931000
P22061	P22061	Protein-L-isoaspartate(D-aspartate) O-methyltransferase	PCMT1	sp|P22061|PIMT_HUMAN Protein-L-isoaspartate(D-aspartate) O-methyltransferase OS=Homo sapiens OX=9606 GN=PCMT1 PE=1 SV=4	1	6	6	6	44.5	24.636	227	141.06	4	4	4	4	4	4	37	40.1	401350000	156040000	245310000	33446000	13004000	20442000
P60709;P63261;P68133;P68032;P62736;P63267;Q6S8J3;A5A3E0;Q562R1;P0CG38;Q9BYX7;P0CG39	P60709;P63261;P68133;P68032;P62736;P63267	Actin, cytoplasmic 1;Actin, cytoplasmic 2;Actin, alpha skeletal muscle	ACTB;ACTG1;ACTA1	sp|P60709|ACTB_HUMAN Actin, cytoplasmic 1 OS=Homo sapiens OX=9606 GN=ACTB PE=1 SV=1;sp|P63261|ACTG_HUMAN Actin, cytoplasmic 2 OS=Homo sapiens OX=9606 GN=ACTG1 PE=1 SV=1;sp|P68133|ACTS_HUMAN Actin, alpha skeletal muscle OS=Homo sapiens OX=9606 GN=ACTA1 PE=1	12	8	8	8	25.6	41.736	375	87.586	7	4	7	4	7	4	22.7	13.6	578740000	273750000	305000000	25163000	11902000	13261000
O14893	O14893	Gem-associated protein 2	GEMIN2	sp|O14893|GEMI2_HUMAN Gem-associated protein 2 OS=Homo sapiens OX=9606 GN=GEMIN2 PE=1 SV=1	1	4	4	4	33.9	31.585	280	55.732	0	4	0	4	0	4	0	33.9	225260000	0	225260000	15018000	0	15018000
P63173	P63173	60S ribosomal protein L38	RPL38	sp|P63173|RL38_HUMAN 60S ribosomal protein L38 OS=Homo sapiens OX=9606 GN=RPL38 PE=1 SV=2	1	4	4	4	40	8.2178	70	46.395	3	4	3	4	3	4	35.7	40	532390000	383600000	148790000	177460000	127870000	49598000
P14678;P63162	P14678;P63162	Small nuclear ribonucleoprotein-associated proteins B and B;Small nuclear ribonucleoprotein-associated protein N	SNRPB;SNRPN	sp|P14678|RSMB_HUMAN Small nuclear ribonucleoprotein-associated proteins B and B OS=Homo sapiens OX=9606 GN=SNRPB PE=1 SV=2;sp|P63162|RSMN_HUMAN Small nuclear ribonucleoprotein-associated protein N OS=Homo sapiens OX=9606 GN=SNRPN PE=1 SV=1	2	4	4	4	20	24.61	240	35.472	0	4	0	4	0	4	0	20	107030000	0	107030000	6295900	0	6295900
P62263	P62263	40S ribosomal protein S14	RPS14	sp|P62263|RS14_HUMAN 40S ribosomal protein S14 OS=Homo sapiens OX=9606 GN=RPS14 PE=1 SV=3	1	4	4	4	33.1	16.273	151	33.015	1	4	1	4	1	4	13.9	33.1	130900000	26678000	104220000	21816000	4446300	17370000
P61247	P61247	40S ribosomal protein S3a	RPS3A	sp|P61247|RS3A_HUMAN 40S ribosomal protein S3a OS=Homo sapiens OX=9606 GN=RPS3A PE=1 SV=2	1	5	5	5	23.5	29.945	264	31.5	1	4	1	4	1	4	3	20.5	78382000	30095000	48287000	4125400	1584000	2541400
P62424	P62424	60S ribosomal protein L7a	RPL7A	sp|P62424|RL7A_HUMAN 60S ribosomal protein L7a OS=Homo sapiens OX=9606 GN=RPL7A PE=1 SV=2	1	5	5	5	20.7	29.995	266	31.474	4	4	4	4	4	4	20.3	15.4	304960000	154980000	149990000	23459000	11921000	11537000
Q00059	Q00059	Transcription factor A, mitochondrial	TFAM	sp|Q00059|TFAM_HUMAN Transcription factor A, mitochondrial OS=Homo sapiens OX=9606 GN=TFAM PE=1 SV=1	1	4	4	4	16.7	29.096	246	29.878	0	4	0	4	0	4	0	16.7	140900000	0	140900000	7045200	0	7045200
P07910;O60812;B7ZW38;B2RXH8;P0DMR1;A0A0G2JPF8;A0A0G2JNQ3	P07910;O60812;B7ZW38;B2RXH8;P0DMR1;A0A0G2JPF8;A0A0G2JNQ3	Heterogeneous nuclear ribonucleoproteins C1/C2;Heterogeneous nuclear ribonucleoprotein C-like 1;	HNRNPC;HNRNPCL1;	sp|P07910|HNRPC_HUMAN Heterogeneous nuclear ribonucleoproteins C1/C2 OS=Homo sapiens OX=9606 GN=HNRNPC PE=1 SV=4;sp|O60812|HNRC1_HUMAN Heterogeneous nuclear ribonucleoprotein C-like 1 OS=Homo sapiens OX=9606 GN=HNRNPCL1 PE=1 SV=1;sp|B7ZW38|HNRC3_HUMAN Hete	7	4	4	4	14.1	33.67	306	29.554	3	4	3	4	3	4	7.8	14.1	110710000	39546000	71169000	5032500	1797500	3234900
Q06033	Q06033	Inter-alpha-trypsin inhibitor heavy chain H3	ITIH3	sp|Q06033|ITIH3_HUMAN Inter-alpha-trypsin inhibitor heavy chain H3 OS=Homo sapiens OX=9606 GN=ITIH3 PE=1 SV=2	1	4	4	4	6.9	99.848	890	26.914	0	4	0	4	0	4	0	6.9	101100000	0	101100000	2197800	0	2197800
Q04837	Q04837	Single-stranded DNA-binding protein, mitochondrial	SSBP1	sp|Q04837|SSBP_HUMAN Single-stranded DNA-binding protein, mitochondrial OS=Homo sapiens OX=9606 GN=SSBP1 PE=1 SV=1	1	4	4	4	44.6	17.259	148	25.311	0	4	0	4	0	4	0	44.6	54949000	0	54949000	5494900	0	5494900
P0C0L5;P0C0L4	P0C0L5;P0C0L4	Complement C4-B;Complement C4-A	C4B_2;C4A	sp|P0C0L5|CO4B_HUMAN Complement C4-B OS=Homo sapiens OX=9606 GN=C4B_2 PE=1 SV=2;sp|P0C0L4|CO4A_HUMAN Complement C4-A OS=Homo sapiens OX=9606 GN=C4A PE=1 SV=2	2	3	3	3	2.9	192.75	1744	60.026	0	3	0	3	0	3	0	2.9	366800000	0	366800000	4030800	0	4030800
P02768	P02768	Albumin	ALB	sp|P02768|ALBU_HUMAN Albumin OS=Homo sapiens OX=9606 GN=ALB PE=1 SV=2	1	6	6	6	11.5	69.366	609	45.08	5	3	5	3	5	3	9.9	6.1	1812800000	443440000	1369300000	43162000	10558000	32604000
P18887	P18887	DNA repair protein XRCC1	XRCC1	sp|P18887|XRCC1_HUMAN DNA repair protein XRCC1 OS=Homo sapiens OX=9606 GN=XRCC1 PE=1 SV=3	1	3	3	3	5.2	69.497	633	31.208	0	3	0	3	0	3	0	5.2	54697000	0	54697000	1709300	0	1709300
P62269	P62269	40S ribosomal protein S18	RPS18	sp|P62269|RS18_HUMAN 40S ribosomal protein S18 OS=Homo sapiens OX=9606 GN=RPS18 PE=1 SV=3	1	4	4	4	32.2	17.718	152	28.346	1	3	1	3	1	3	7.2	25	64124000	18378000	45746000	5343700	1531500	3812200
P62318	P62318	Small nuclear ribonucleoprotein Sm D3	SNRPD3	sp|P62318|SMD3_HUMAN Small nuclear ribonucleoprotein Sm D3 OS=Homo sapiens OX=9606 GN=SNRPD3 PE=1 SV=1	1	3	3	3	32.5	13.916	126	24.397	1	3	1	3	1	3	7.9	32.5	240910000	22552000	218360000	26768000	2505800	24262000
P02787	P02787	Serotransferrin	TF	sp|P02787|TRFE_HUMAN Serotransferrin OS=Homo sapiens OX=9606 GN=TF PE=1 SV=3	1	3	3	3	6	77.063	698	22.202	0	3	0	3	0	3	0	6	70125000	0	70125000	1558300	0	1558300
P12956	P12956	X-ray repair cross-complementing protein 6	XRCC6	sp|P12956|XRCC6_HUMAN X-ray repair cross-complementing protein 6 OS=Homo sapiens OX=9606 GN=XRCC6 PE=1 SV=2	1	3	3	3	7.4	69.842	609	21.889	0	3	0	3	0	3	0	7.4	93751000	0	93751000	2343800	0	2343800
P62081	P62081	40S ribosomal protein S7	RPS7	sp|P62081|RS7_HUMAN 40S ribosomal protein S7 OS=Homo sapiens OX=9606 GN=RPS7 PE=1 SV=1	1	3	3	3	26.8	22.127	194	20.887	2	3	2	3	2	3	18	26.8	41600000	18952000	22648000	4160000	1895200	2264800
Q06830;P32119;Q13162	Q06830	Peroxiredoxin-1	PRDX1	sp|Q06830|PRDX1_HUMAN Peroxiredoxin-1 OS=Homo sapiens OX=9606 GN=PRDX1 PE=1 SV=1	3	3	3	3	16.6	22.11	199	19.351	0	3	0	3	0	3	0	16.6	85296000	0	85296000	5686400	0	5686400
P11142;P54652	P11142;P54652	Heat shock cognate 71 kDa protein;Heat shock-related 70 kDa protein 2	HSPA8;HSPA2	sp|P11142|HSP7C_HUMAN Heat shock cognate 71 kDa protein OS=Homo sapiens OX=9606 GN=HSPA8 PE=1 SV=1;sp|P54652|HSP72_HUMAN Heat shock-related 70 kDa protein 2 OS=Homo sapiens OX=9606 GN=HSPA2 PE=1 SV=1	2	4	3	3	7.4	70.897	646	18.791	0	4	0	3	0	3	0	7.4	34965000	0	34965000	945010	0	945010
Q9NWZ8	Q9NWZ8	Gem-associated protein 8	GEMIN8	sp|Q9NWZ8|GEMI8_HUMAN Gem-associated protein 8 OS=Homo sapiens OX=9606 GN=GEMIN8 PE=1 SV=1	1	3	3	3	18.2	28.636	242	18.423	0	3	0	3	0	3	0	18.2	270370000	0	270370000	20798000	0	20798000
Q71DI3	Q71DI3	Histone H3.2	H3C13	sp|Q71DI3|H32_HUMAN Histone H3.2 OS=Homo sapiens OX=9606 GN=H3C13 PE=1 SV=3	1	10	10	2	69.9	15.388	136	230.78	1	9	1	9	0	2	5.1	64.7	6087900000	0	6087900000	1014600000	0	1014600000
P14618	P14618	Pyruvate kinase PKM	PKM	sp|P14618|KPYM_HUMAN Pyruvate kinase PKM OS=Homo sapiens OX=9606 GN=PKM PE=1 SV=4	1	2	2	2	5.6	57.936	531	219.46	1	2	1	2	1	2	2.4	5.6	24003000	12417000	11586000	631660	326770	304890
Q07020	Q07020	60S ribosomal protein L18	RPL18	sp|Q07020|RL18_HUMAN 60S ribosomal protein L18 OS=Homo sapiens OX=9606 GN=RPL18 PE=1 SV=2	1	7	7	7	36.2	21.634	188	100.56	7	2	7	2	7	2	36.2	13.8	182730000	171880000	10842000	20303000	19098000	1204600
Q9UIL1	Q9UIL1	Short coiled-coil protein	SCOC	sp|Q9UIL1|SCOC_HUMAN Short coiled-coil protein OS=Homo sapiens OX=9606 GN=SCOC PE=1 SV=2	1	2	2	2	17.6	18.045	159	80.544	0	2	0	2	0	2	0	17.6	31485000	0	31485000	4497900	0	4497900
P17066;P48741	P17066;P48741	Heat shock 70 kDa protein 6;Putative heat shock 70 kDa protein 7	HSPA6;HSPA7	sp|P17066|HSP76_HUMAN Heat shock 70 kDa protein 6 OS=Homo sapiens OX=9606 GN=HSPA6 PE=1 SV=2;sp|P48741|HSP77_HUMAN Putative heat shock 70 kDa protein 7 OS=Homo sapiens OX=9606 GN=HSPA7 PE=5 SV=2	2	5	5	2	8.1	71.027	643	78.477	1	5	1	5	1	2	1.7	8.1	60597000	8745300	51852000	1553800	224240	1329500
P36578	P36578	60S ribosomal protein L4	RPL4	sp|P36578|RL4_HUMAN 60S ribosomal protein L4 OS=Homo sapiens OX=9606 GN=RPL4 PE=1 SV=5	1	6	6	6	22.7	47.697	427	68.129	5	2	5	2	5	2	18.3	10.3	123420000	116550000	6865800	4571000	4316700	254290
P19338	P19338	Nucleolin	NCL	sp|P19338|NUCL_HUMAN Nucleolin OS=Homo sapiens OX=9606 GN=NCL PE=1 SV=3	1	6	6	6	15.4	76.613	710	67.009	5	2	5	2	5	2	12.3	6.2	86746000	62233000	24513000	1885800	1352900	532890
P07437;Q9BVA1;Q13885;Q13509	P07437;Q9BVA1;Q13885;Q13509	Tubulin beta chain;Tubulin beta-2B chain;Tubulin beta-2A chain	TUBB;TUBB2B;TUBB2A	sp|P07437|TBB5_HUMAN Tubulin beta chain OS=Homo sapiens OX=9606 GN=TUBB PE=1 SV=2;sp|Q9BVA1|TBB2B_HUMAN Tubulin beta-2B chain OS=Homo sapiens OX=9606 GN=TUBB2B PE=1 SV=1;sp|Q13885|TBB2A_HUMAN Tubulin beta-2A chain OS=Homo sapiens OX=9606 GN=TUBB2A PE=1 SV=	4	6	6	2	19.4	49.67	444	66.214	1	5	1	5	0	2	5.9	13.5	95532000	17886000	77646000	4342300	812990	3529400
Q9Y223	Q9Y223	Bifunctional UDP-N-acetylglucosamine 2-epimerase/N-acetylmannosamine kinase	GNE	sp|Q9Y223|GLCNE_HUMAN Bifunctional UDP-N-acetylglucosamine 2-epimerase/N-acetylmannosamine kinase OS=Homo sapiens OX=9606 GN=GNE PE=1 SV=1	1	2	2	2	6.4	79.274	722	58.278	0	2	0	2	0	2	0	6.4	43511000	0	43511000	1115700	0	1115700
P46779	P46779	60S ribosomal protein L28	RPL28	sp|P46779|RL28_HUMAN 60S ribosomal protein L28 OS=Homo sapiens OX=9606 GN=RPL28 PE=1 SV=3	1	5	5	5	46.7	15.747	137	44.049	5	2	5	2	5	2	46.7	18.2	310630000	165250000	145380000	34515000	18361000	16153000
P68431;Q16695;Q6NXT2	P68431;Q16695;Q6NXT2	Histone H3.1;Histone H3.1t;Histone H3.3C	H3C12;H3-4;H3-5	sp|P68431|H31_HUMAN Histone H3.1 OS=Homo sapiens OX=9606 GN=H3C12 PE=1 SV=2;sp|Q16695|H31T_HUMAN Histone H3.1t OS=Homo sapiens OX=9606 GN=H3-4 PE=1 SV=3;sp|Q6NXT2|H3C_HUMAN Histone H3.3C OS=Homo sapiens OX=9606 GN=H3-5 PE=1 SV=3	3	10	2	2	69.9	15.404	136	40.106	1	9	0	2	0	2	5.1	64.7	85088000	0	85088000	14181000	0	14181000
P84243	P84243	Histone H3.3	H3-3B	sp|P84243|H33_HUMAN Histone H3.3 OS=Homo sapiens OX=9606 GN=H3-3B PE=1 SV=2	1	9	2	2	60.3	15.328	136	36.675	1	8	0	2	0	2	5.1	55.1	71226000	0	71226000	11871000	0	11871000
P68104;Q5VTE0;Q05639	P68104;Q5VTE0	Elongation factor 1-alpha 1;Putative elongation factor 1-alpha-like 3	EEF1A1;EEF1A1P5	sp|P68104|EF1A1_HUMAN Elongation factor 1-alpha 1 OS=Homo sapiens OX=9606 GN=EEF1A1 PE=1 SV=1;sp|Q5VTE0|EF1A3_HUMAN Putative elongation factor 1-alpha-like 3 OS=Homo sapiens OX=9606 GN=EEF1A1P5 PE=5 SV=1	3	6	6	6	16.7	50.14	462	36.091	4	2	4	2	4	2	14.1	5	117270000	67143000	50127000	4690800	2685700	2005100
P62753	P62753	40S ribosomal protein S6	RPS6	sp|P62753|RS6_HUMAN 40S ribosomal protein S6 OS=Homo sapiens OX=9606 GN=RPS6 PE=1 SV=1	1	3	3	3	18.9	28.68	249	30.327	2	2	2	2	2	2	10.8	14.5	105370000	68150000	37215000	8105000	5242300	2862700
P61353	P61353	60S ribosomal protein L27	RPL27	sp|P61353|RL27_HUMAN 60S ribosomal protein L27 OS=Homo sapiens OX=9606 GN=RPL27 PE=1 SV=2	1	2	2	2	14	15.798	136	29.974	1	2	1	2	1	2	5.9	14	40361000	11804000	28557000	6726800	1967300	4759500
P27816	P27816	Microtubule-associated protein 4	MAP4	sp|P27816|MAP4_HUMAN Microtubule-associated protein 4 OS=Homo sapiens OX=9606 GN=MAP4 PE=1 SV=3	1	2	2	2	2.8	121	1152	28.629	0	2	0	2	0	2	0	2.8	33370000	0	33370000	469990	0	469990
Q93077;Q7L7L0;P04908	Q93077;Q7L7L0;P04908	Histone H2A type 1-C;Histone H2A type 3;Histone H2A type 1-B/E	H2AC6;H2AW;H2AC8	sp|Q93077|H2A1C_HUMAN Histone H2A type 1-C OS=Homo sapiens OX=9606 GN=H2AC6 PE=1 SV=3;sp|Q7L7L0|H2A3_HUMAN Histone H2A type 3 OS=Homo sapiens OX=9606 GN=H2AW PE=1 SV=3;sp|P04908|H2A1B_HUMAN Histone H2A type 1-B/E OS=Homo sapiens OX=9606 GN=H2AC8 PE=1 SV=2	3	6	2	2	45.4	14.105	130	26.82	1	6	0	2	0	2	6.9	45.4	144450000	0	144450000	20635000	0	20635000
P49207	P49207	60S ribosomal protein L34	RPL34	sp|P49207|RL34_HUMAN 60S ribosomal protein L34 OS=Homo sapiens OX=9606 GN=RPL34 PE=1 SV=3	1	4	4	4	29.9	13.293	117	26.644	4	2	4	2	4	2	29.9	19.7	125960000	97113000	28847000	20993000	16186000	4807900
P39023;Q92901	P39023;Q92901	60S ribosomal protein L3;60S ribosomal protein L3-like	RPL3;RPL3L	sp|P39023|RL3_HUMAN 60S ribosomal protein L3 OS=Homo sapiens OX=9606 GN=RPL3 PE=1 SV=2;sp|Q92901|RL3L_HUMAN 60S ribosomal protein L3-like OS=Homo sapiens OX=9606 GN=RPL3L PE=1 SV=3	2	4	4	4	9.2	46.108	403	25.937	4	2	4	2	4	2	9.2	5.7	103450000	86205000	17247000	4926300	4105000	821280
P05109	P05109	Protein S100-A8	S100A8	sp|P05109|S10A8_HUMAN Protein S100-A8 OS=Homo sapiens OX=9606 GN=S100A8 PE=1 SV=1	1	2	2	2	23.7	10.834	93	24.295	1	2	1	2	1	2	11.8	23.7	43064000	24747000	18317000	5383000	3093300	2289700
P06702	P06702	Protein S100-A9	S100A9	sp|P06702|S10A9_HUMAN Protein S100-A9 OS=Homo sapiens OX=9606 GN=S100A9 PE=1 SV=1	1	2	2	2	28.9	13.242	114	22.755	1	2	1	2	1	2	13.2	28.9	140020000	76786000	63232000	15558000	8531800	7025800
Q02543	Q02543	60S ribosomal protein L18a	RPL18A	sp|Q02543|RL18A_HUMAN 60S ribosomal protein L18a OS=Homo sapiens OX=9606 GN=RPL18A PE=1 SV=2	1	4	4	4	24.4	20.762	176	22.72	3	2	3	2	3	2	18.8	12.5	90719000	46930000	43789000	6978400	3610000	3368400
P04406	P04406	Glyceraldehyde-3-phosphate dehydrogenase	GAPDH	sp|P04406|G3P_HUMAN Glyceraldehyde-3-phosphate dehydrogenase OS=Homo sapiens OX=9606 GN=GAPDH PE=1 SV=3	1	3	3	3	11	36.053	335	21.769	2	2	2	2	2	2	6.9	8.7	59529000	31086000	28443000	3133100	1636100	1497000
P62701	P62701	40S ribosomal protein S4, X isoform	RPS4X	sp|P62701|RS4X_HUMAN 40S ribosomal protein S4, X isoform OS=Homo sapiens OX=9606 GN=RPS4X PE=1 SV=2	1	3	3	3	21.3	29.597	263	21.378	2	2	2	2	2	2	11.8	16.7	112190000	39654000	72536000	5342400	1888300	3454100
P46776	P46776	60S ribosomal protein L27a	RPL27A	sp|P46776|RL27A_HUMAN 60S ribosomal protein L27a OS=Homo sapiens OX=9606 GN=RPL27A PE=1 SV=2	1	3	3	3	23.6	16.561	148	21.18	2	2	2	2	2	2	8.8	23.6	140400000	111140000	29262000	17550000	13892000	3657700
P68363;Q71U36;Q9BQE3;P68366;Q6PEY2;Q9NY65;P0DPH8;P0DPH7	P68363;Q71U36;Q9BQE3;P68366;Q6PEY2;Q9NY65;P0DPH8;P0DPH7	Tubulin alpha-1B chain;Tubulin alpha-1A chain;Tubulin alpha-1C chain	TUBA1B;TUBA1A;	sp|P68363|TBA1B_HUMAN Tubulin alpha-1B chain OS=Homo sapiens OX=9606 GN=TUBA1B PE=1 SV=1;sp|Q71U36|TBA1A_HUMAN Tubulin alpha-1A chain OS=Homo sapiens OX=9606 GN=TUBA1A PE=1 SV=1;sp|Q9BQE3|TBA1C_HUMAN Tubulin alpha-1C chain OS=Homo sapiens OX=9606 GN=TUBA1C	8	2	2	2	7.1	50.151	451	18.43	1	2	1	2	1	2	3.3	7.1	17474000	8269800	9204100	759740	359560	400180
P62249	P62249	40S ribosomal protein S16	RPS16	sp|P62249|RS16_HUMAN 40S ribosomal protein S16 OS=Homo sapiens OX=9606 GN=RPS16 PE=1 SV=2	1	3	3	3	27.4	16.445	146	18.374	2	2	2	2	2	2	17.8	17.8	87794000	41223000	46571000	7316200	3435200	3880900
P68871;P02042;P69892;P69891;P02100	P68871;P02042;P69892;P69891;P02100	Hemoglobin subunit beta;Hemoglobin subunit delta;Hemoglobin subunit gamma-2	HBB;HBD;HBG2	sp|P68871|HBB_HUMAN Hemoglobin subunit beta OS=Homo sapiens OX=9606 GN=HBB PE=1 SV=2;sp|P02042|HBD_HUMAN Hemoglobin subunit delta OS=Homo sapiens OX=9606 GN=HBD PE=1 SV=2;sp|P69892|HBG2_HUMAN Hemoglobin subunit gamma-2 OS=Homo sapiens OX=9606 GN=HBG2 PE=1	5	2	2	2	16.3	15.998	147	15.542	1	2	1	2	1	2	6.8	16.3	73140000	14646000	58494000	6649100	1331500	5317600
Q641Q2	Q641Q2	WASH complex subunit 2A	WASHC2A	sp|Q641Q2|WAC2A_HUMAN WASH complex subunit 2A OS=Homo sapiens OX=9606 GN=WASHC2A PE=1 SV=3	1	2	2	2	3.5	147.18	1341	15.28	0	2	0	2	0	2	0	3.5	40364000	0	40364000	560620	0	560620
P60866	P60866	40S ribosomal protein S20	RPS20	sp|P60866|RS20_HUMAN 40S ribosomal protein S20 OS=Homo sapiens OX=9606 GN=RPS20 PE=1 SV=1	1	2	2	2	25.2	13.373	119	15.264	1	2	1	2	1	2	15.1	25.2	181330000	85008000	96318000	30221000	14168000	16053000
P50402	P50402	Emerin	EMD	sp|P50402|EMD_HUMAN Emerin OS=Homo sapiens OX=9606 GN=EMD PE=1 SV=1	1	2	2	2	12.6	28.994	254	15.013	0	2	0	2	0	2	0	12.6	31456000	0	31456000	2419700	0	2419700
Q4VCS5;Q8IY63	Q4VCS5;Q8IY63	Angiomotin;Angiomotin-like protein 1	AMOT;AMOTL1	sp|Q4VCS5|AMOT_HUMAN Angiomotin OS=Homo sapiens OX=9606 GN=AMOT PE=1 SV=1;sp|Q8IY63|AMOL1_HUMAN Angiomotin-like protein 1 OS=Homo sapiens OX=9606 GN=AMOTL1 PE=1 SV=1	2	2	2	2	2.6	118.08	1084	14.964	0	2	0	2	0	2	0	2.6	9323300	0	9323300	163570	0	163570
P62829	P62829	60S ribosomal protein L23	RPL23	sp|P62829|RL23_HUMAN 60S ribosomal protein L23 OS=Homo sapiens OX=9606 GN=RPL23 PE=1 SV=1	1	2	2	2	27.1	14.865	140	14.325	1	2	1	2	1	2	14.3	27.1	190310000	93628000	96682000	21146000	10403000	10742000
P0DMV8;P0DMV9;P34931	P0DMV8;P0DMV9;P34931	Heat shock 70 kDa protein 1A;Heat shock 70 kDa protein 1B;Heat shock 70 kDa protein 1-like	HSPA1A;HSPA1B;	sp|P0DMV8|HS71A_HUMAN Heat shock 70 kDa protein 1A OS=Homo sapiens OX=9606 GN=HSPA1A PE=1 SV=1;sp|P0DMV9|HS71B_HUMAN Heat shock 70 kDa protein 1B OS=Homo sapiens OX=9606 GN=HSPA1B PE=1 SV=1;sp|P34931|HS71L_HUMAN Heat shock 70 kDa protein 1-like OS=Homo sap	3	5	2	2	9.4	70.051	641	13.767	0	5	0	2	0	2	0	9.4	29216000	0	29216000	811560	0	811560
P42677;Q71UM5	P42677;Q71UM5	40S ribosomal protein S27;40S ribosomal protein S27-like	RPS27;RPS27L	sp|P42677|RS27_HUMAN 40S ribosomal protein S27 OS=Homo sapiens OX=9606 GN=RPS27 PE=1 SV=3;sp|Q71UM5|RS27L_HUMAN 40S ribosomal protein S27-like OS=Homo sapiens OX=9606 GN=RPS27L PE=1 SV=3	2	2	2	2	31	9.461	84	13.407	1	2	1	2	1	2	15.5	31	142460000	55062000	87402000	28493000	11012000	17480000
P62891;Q59GN2	P62891;Q59GN2	60S ribosomal protein L39;Putative 60S ribosomal protein L39-like 5	RPL39;RPL39P5	sp|P62891|RL39_HUMAN 60S ribosomal protein L39 OS=Homo sapiens OX=9606 GN=RPL39 PE=1 SV=2;sp|Q59GN2|R39L5_HUMAN Putative 60S ribosomal protein L39-like 5 OS=Homo sapiens OX=9606 GN=RPL39P5 PE=5 SV=2	2	2	2	2	23.5	6.4066	51	13.337	2	2	2	2	2	2	23.5	23.5	221870000	138880000	82987000	221870000	138880000	82987000
P01602	P01602	Immunoglobulin kappa variable 1-5	IGKV1-5	sp|P01602|KV105_HUMAN Immunoglobulin kappa variable 1-5 OS=Homo sapiens OX=9606 GN=IGKV1-5 PE=1 SV=2	1	2	2	2	13.7	12.781	117	12.763	0	2	0	2	0	2	0	13.7	376910000	0	376910000	75381000	0	75381000
O00264	O00264	Membrane-associated progesterone receptor component 1	PGRMC1	sp|O00264|PGRC1_HUMAN Membrane-associated progesterone receptor component 1 OS=Homo sapiens OX=9606 GN=PGRMC1 PE=1 SV=3	1	2	2	2	7.7	21.671	195	12.68	0	2	0	2	0	2	0	7.7	18099000	0	18099000	1809900	0	1809900
P18621	P18621	60S ribosomal protein L17	RPL17	sp|P18621|RL17_HUMAN 60S ribosomal protein L17 OS=Homo sapiens OX=9606 GN=RPL17 PE=1 SV=3	1	2	2	2	21.2	21.397	184	11.653	1	2	1	2	1	2	15.2	21.2	60581000	25240000	35341000	5048400	2103300	2945100
P18077	P18077	60S ribosomal protein L35a	RPL35A	sp|P18077|RL35A_HUMAN 60S ribosomal protein L35a OS=Homo sapiens OX=9606 GN=RPL35A PE=1 SV=2	1	2	2	2	16.4	12.538	110	11.254	0	2	0	2	0	2	0	16.4	18507000	0	18507000	2056400	0	2056400
P08621	P08621	U1 small nuclear ribonucleoprotein 70 kDa	SNRNP70	sp|P08621|RU17_HUMAN U1 small nuclear ribonucleoprotein 70 kDa OS=Homo sapiens OX=9606 GN=SNRNP70 PE=1 SV=2	1	2	2	2	4.8	51.556	437	11.145	0	2	0	2	0	2	0	4.8	8897900	0	8897900	468310	0	468310
A0A0J9YY99	A0A0J9YY99	Ig-like domain-containing protein (Fragment)		tr|A0A0J9YY99|A0A0J9YY99_HUMAN Ig-like domain-containing protein (Fragment) OS=Homo sapiens OX=9606 PE=1 SV=1	1	2	2	2	12	12.965	117	10.987	0	2	0	2	0	2	0	12	15948000	0	15948000	1993500	0	1993500
P84090	P84090	Enhancer of rudimentary homolog	ERH	sp|P84090|ERH_HUMAN Enhancer of rudimentary homolog OS=Homo sapiens OX=9606 GN=ERH PE=1 SV=1	1	4	4	4	39.4	12.259	104	323.31	4	1	4	1	4	1	39.4	15.4	1357700000	1316200000	41553000	226290000	219370000	6925500
P35579;P35749;Q7Z406	P35579	Myosin-9	MYH9	sp|P35579|MYH9_HUMAN Myosin-9 OS=Homo sapiens OX=9606 GN=MYH9 PE=1 SV=4	3	30	30	27	22.1	226.53	1960	323.31	30	1	30	1	27	1	22.1	0.5	728530000	722930000	5604000	5647500	5604100	43441
O60814;P57053;P06899	O60814;P57053;P06899	Histone H2B type 1-K;Histone H2B type F-S;Histone H2B type 1-J	H2BC12;H2BC12L;H2BC11	sp|O60814|H2B1K_HUMAN Histone H2B type 1-K OS=Homo sapiens OX=9606 GN=H2BC12 PE=1 SV=3;sp|P57053|H2BFS_HUMAN Histone H2B type F-S OS=Homo sapiens OX=9606 GN=H2BC12L PE=1 SV=2;sp|P06899|H2B1J_HUMAN Histone H2B type 1-J OS=Homo sapiens OX=9606 GN=H2BC11 PE=1	3	8	8	1	60.3	13.89	126	312.14	3	8	3	8	0	1	31	60.3	4587200000	108510000	4478700000	417010000	9864400	407150000
P62241	P62241	40S ribosomal protein S8	RPS8	sp|P62241|RS8_HUMAN 40S ribosomal protein S8 OS=Homo sapiens OX=9606 GN=RPS8 PE=1 SV=2	1	5	5	5	38.9	24.205	208	192.08	5	1	5	1	5	1	38.9	6.2	205690000	180590000	25092000	18699000	16418000	2281100
P42766	P42766	60S ribosomal protein L35	RPL35	sp|P42766|RL35_HUMAN 60S ribosomal protein L35 OS=Homo sapiens OX=9606 GN=RPL35 PE=1 SV=2	1	3	3	3	22.8	14.551	123	178.81	3	1	3	1	3	1	22.8	12.2	313340000	217820000	95526000	62669000	43563000	19105000
P52272	P52272	Heterogeneous nuclear ribonucleoprotein M	HNRNPM	sp|P52272|HNRPM_HUMAN Heterogeneous nuclear ribonucleoprotein M OS=Homo sapiens OX=9606 GN=HNRNPM PE=1 SV=3	1	10	10	10	20.5	77.515	730	156.36	10	1	10	1	10	1	20.5	3.2	307650000	289930000	17719000	5593700	5271500	322160
P83731	P83731	60S ribosomal protein L24	RPL24	sp|P83731|RL24_HUMAN 60S ribosomal protein L24 OS=Homo sapiens OX=9606 GN=RPL24 PE=1 SV=1	1	4	4	4	22.3	17.779	157	99.776	4	1	4	1	4	1	22.3	7.6	151950000	119960000	31986000	18993000	14995000	3998200
P60660;P14649	P60660	Myosin light polypeptide 6	MYL6	sp|P60660|MYL6_HUMAN Myosin light polypeptide 6 OS=Homo sapiens OX=9606 GN=MYL6 PE=1 SV=2	2	5	5	5	49.7	16.93	151	44.855	5	1	5	1	5	1	49.7	7.3	335700000	322710000	12990000	30518000	29337000	1180900
P39019	P39019	40S ribosomal protein S19	RPS19	sp|P39019|RS19_HUMAN 40S ribosomal protein S19 OS=Homo sapiens OX=9606 GN=RPS19 PE=1 SV=2	1	2	2	2	17.2	16.06	145	43.638	2	1	2	1	2	1	17.2	10.3	44894000	22913000	21981000	3741200	1909400	1831800
A0A0C4DH35	A0A0C4DH35	Probable non-functional immunoglobulin heavy variable 3-35	IGHV3-35	sp|A0A0C4DH35|HV335_HUMAN Probable non-functional immunoglobulin heavy variable 3-35 OS=Homo sapiens OX=9606 GN=IGHV3-35 PE=1 SV=1	1	1	1	1	6	12.81	117	40.656	0	1	0	1	0	1	0	6	187500000	0	187500000	26785000	0	26785000
P06748	P06748	Nucleophosmin	NPM1	sp|P06748|NPM_HUMAN Nucleophosmin OS=Homo sapiens OX=9606 GN=NPM1 PE=1 SV=2	1	4	4	4	24.1	32.575	294	37.789	3	1	3	1	3	1	17	7.1	76020000	60900000	15120000	4471800	3582400	889420
P46781	P46781	40S ribosomal protein S9	RPS9	sp|P46781|RS9_HUMAN 40S ribosomal protein S9 OS=Homo sapiens OX=9606 GN=RPS9 PE=1 SV=3	1	4	4	4	18	22.591	194	35.383	4	1	4	1	4	1	18	6.2	29363000	16344000	13019000	2097400	1167400	929960
Q13428	Q13428	Treacle protein	TCOF1	sp|Q13428|TCOF_HUMAN Treacle protein OS=Homo sapiens OX=9606 GN=TCOF1 PE=1 SV=3	1	2	2	2	1.5	152.1	1488	30.695	1	1	1	1	1	1	0.7	0.8	40443000	27841000	12602000	481470	331450	150020
P53999	P53999	Activated RNA polymerase II transcriptional coactivator p15	SUB1	sp|P53999|TCP4_HUMAN Activated RNA polymerase II transcriptional coactivator p15 OS=Homo sapiens OX=9606 GN=SUB1 PE=1 SV=3	1	3	3	3	30.7	14.395	127	29.486	3	1	3	1	3	1	30.7	18.9	79845000	70028000	9816800	7984500	7002800	981680
P62917	P62917	60S ribosomal protein L8	RPL8	sp|P62917|RL8_HUMAN 60S ribosomal protein L8 OS=Homo sapiens OX=9606 GN=RPL8 PE=1 SV=2	1	4	4	4	26.1	28.024	257	28.279	3	1	3	1	3	1	19.1	7	38863000	38863000	0	2989500	2989500	0
P31943;P55795	P31943;P55795	Heterogeneous nuclear ribonucleoprotein H;Heterogeneous nuclear ribonucleoprotein H2	HNRNPH1;HNRNPH2	sp|P31943|HNRH1_HUMAN Heterogeneous nuclear ribonucleoprotein H OS=Homo sapiens OX=9606 GN=HNRNPH1 PE=1 SV=4;sp|P55795|HNRH2_HUMAN Heterogeneous nuclear ribonucleoprotein H2 OS=Homo sapiens OX=9606 GN=HNRNPH2 PE=1 SV=1	2	3	3	3	10.2	49.229	449	27.065	2	1	2	1	2	1	7.3	2.9	55984000	31661000	24323000	2153200	1217700	935500
P62913	P62913	60S ribosomal protein L11	RPL11	sp|P62913|RL11_HUMAN 60S ribosomal protein L11 OS=Homo sapiens OX=9606 GN=RPL11 PE=1 SV=2	1	2	2	2	14.6	20.252	178	26.902	2	1	2	1	2	1	14.6	7.9	106320000	56991000	49333000	10632000	5699100	4933300
P50914	P50914	60S ribosomal protein L14	RPL14	sp|P50914|RL14_HUMAN 60S ribosomal protein L14 OS=Homo sapiens OX=9606 GN=RPL14 PE=1 SV=4	1	3	3	3	11.2	23.432	215	26.687	3	1	3	1	3	1	11.2	5.6	85182000	69936000	15246000	7098500	5828000	1270500
P0DP09;A0A0B4J2D9	P0DP09;A0A0B4J2D9	Immunoglobulin kappa variable 1-13;Immunoglobulin kappa variable 1D-13	IGKV1-13;IGKV1D-13	sp|P0DP09|KV113_HUMAN Immunoglobulin kappa variable 1-13 OS=Homo sapiens OX=9606 GN=IGKV1-13 PE=3 SV=1;sp|A0A0B4J2D9|KVD13_HUMAN Immunoglobulin kappa variable 1D-13 OS=Homo sapiens OX=9606 GN=IGKV1D-13 PE=3 SV=1	2	1	1	1	13.7	12.569	117	25.872	0	1	0	1	0	1	0	13.7	403310000	0	403310000	80662000	0	80662000
P61313	P61313	60S ribosomal protein L15	RPL15	sp|P61313|RL15_HUMAN 60S ribosomal protein L15 OS=Homo sapiens OX=9606 GN=RPL15 PE=1 SV=2	1	4	4	4	23.5	24.146	204	25.15	4	1	4	1	4	1	23.5	5.4	119260000	110960000	8301400	8518600	7925600	592950
P27635;Q96L21	P27635;Q96L21	60S ribosomal protein L10;60S ribosomal protein L10-like	RPL10;RPL10L	sp|P27635|RL10_HUMAN 60S ribosomal protein L10 OS=Homo sapiens OX=9606 GN=RPL10 PE=1 SV=5;sp|Q96L21|RL10L_HUMAN 60S ribosomal protein L10-like OS=Homo sapiens OX=9606 GN=RPL10L PE=1 SV=3	2	4	4	4	24.3	24.577	214	23.287	4	1	4	1	4	1	24.3	5.1	78975000	66377000	12598000	6581300	5531400	1049900
P47929	P47929	Galectin-7	LGALS7B	sp|P47929|LEG7_HUMAN Galectin-7 OS=Homo sapiens OX=9606 GN=LGALS7B PE=1 SV=2	1	1	1	1	14.7	15.075	136	21.094	0	1	0	1	0	1	0	14.7	79626000	0	79626000	7238700	0	7238700
P62910	P62910	60S ribosomal protein L32	RPL32	sp|P62910|RL32_HUMAN 60S ribosomal protein L32 OS=Homo sapiens OX=9606 GN=RPL32 PE=1 SV=2	1	2	2	2	22.2	15.86	135	19.146	1	1	1	1	1	1	9.6	12.6	95534000	85288000	10246000	13648000	12184000	1463700
Q9NZT1	Q9NZT1	Calmodulin-like protein 5	CALML5	sp|Q9NZT1|CALL5_HUMAN Calmodulin-like protein 5 OS=Homo sapiens OX=9606 GN=CALML5 PE=1 SV=2	1	2	2	2	28.1	15.892	146	18.694	2	1	2	1	2	1	28.1	9.6	122230000	70793000	51440000	13582000	7865900	5715600
Q96CW5	Q96CW5	Gamma-tubulin complex component 3	TUBGCP3	sp|Q96CW5|GCP3_HUMAN Gamma-tubulin complex component 3 OS=Homo sapiens OX=9606 GN=TUBGCP3 PE=1 SV=2	1	1	1	1	1.5	103.57	907	18.563	0	1	0	1	0	1	0	1.5	8182300	0	8182300	151520	0	151520
Q16629	Q16629	Serine/arginine-rich splicing factor 7	SRSF7	sp|Q16629|SRSF7_HUMAN Serine/arginine-rich splicing factor 7 OS=Homo sapiens OX=9606 GN=SRSF7 PE=1 SV=1	1	2	2	2	10.9	27.366	238	15.493	1	1	1	1	1	1	7.1	3.8	126730000	105250000	21476000	9051800	7517800	1534000
P01024	P01024	Complement C3	C3	sp|P01024|CO3_HUMAN Complement C3 OS=Homo sapiens OX=9606 GN=C3 PE=1 SV=2	1	2	2	2	1.8	187.15	1663	15.062	1	1	1	1	1	1	0.6	1.2	40342000	33054000	7288700	373540	306050	67488
P37108	P37108	Signal recognition particle 14 kDa protein	SRP14	sp|P37108|SRP14_HUMAN Signal recognition particle 14 kDa protein OS=Homo sapiens OX=9606 GN=SRP14 PE=1 SV=2	1	1	1	1	10.3	14.57	136	14.764	1	1	1	1	1	1	10.3	10.3	21604000	12247000	9357600	3086300	1749500	1336800
A0A0C4DH67;A0A0C4DH69;A0A075B6S5	A0A0C4DH67;A0A0C4DH69;A0A075B6S5	Immunoglobulin kappa variable 1-8;Immunoglobulin kappa variable 1-9;	IGKV1-8;IGKV1-9;	sp|A0A0C4DH67|KV108_HUMAN Immunoglobulin kappa variable 1-8 OS=Homo sapiens OX=9606 GN=IGKV1-8 PE=3 SV=1;sp|A0A0C4DH69|KV109_HUMAN Immunoglobulin kappa variable 1-9 OS=Homo sapiens OX=9606 GN=IGKV1-9 PE=3 SV=1;sp|A0A075B6S5|KV127_HUMAN Immunoglobulin kappa	3	1	1	1	13.9	12.537	115	14.616	0	1	0	1	0	1	0	13.9	1012800000	0	1012800000	202560000	0	202560000
Q8WZ42	Q8WZ42	Titin	TTN	sp|Q8WZ42|TITIN_HUMAN Titin OS=Homo sapiens OX=9606 GN=TTN PE=1 SV=4	1	2	2	2	0.1	3816	34350	14.431	1	1	1	1	1	1	0	0	203980000	50199000	153790000	89271	21969	67302
Q8WUH6	Q8WUH6	Transmembrane protein 263	TMEM263	sp|Q8WUH6|TM263_HUMAN Transmembrane protein 263 OS=Homo sapiens OX=9606 GN=TMEM263 PE=1 SV=1	1	2	2	2	35.3	11.748	116	13.289	1	1	1	1	1	1	22.4	12.9	37183000	11017000	26166000	4131400	1224100	2907400
P01857	P01857	Immunoglobulin heavy constant gamma 1	IGHG1	sp|P01857|IGHG1_HUMAN Immunoglobulin heavy constant gamma 1 OS=Homo sapiens OX=9606 GN=IGHG1 PE=1 SV=1	1	5	2	1	17	36.105	330	13.148	2	4	1	2	1	1	11.2	16.4	4231300000	14994000	4216300000	282090000	999610	281090000
P01594;P01593	P01594;P01593	Immunoglobulin kappa variable 1-33;Immunoglobulin kappa variable 1D-33	IGKV1-33;IGKV1D-33	sp|P01594|KV133_HUMAN Immunoglobulin kappa variable 1-33 OS=Homo sapiens OX=9606 GN=IGKV1-33 PE=1 SV=2;sp|P01593|KVD33_HUMAN Immunoglobulin kappa variable 1D-33 OS=Homo sapiens OX=9606 GN=IGKV1D-33 PE=1 SV=2	2	1	1	1	13.7	12.848	117	12.728	0	1	0	1	0	1	0	13.7	194040000	0	194040000	48510000	0	48510000
P62861	P62861	FAU ubiquitin-like and ribosomal protein S30	FAU	sp|P62861|RS30_HUMAN FAU ubiquitin-like and ribosomal protein S30 OS=Homo sapiens OX=9606 GN=FAU PE=1 SV=2	1	2	2	2	9	14.39	133	12.262	2	1	2	1	2	1	9	8.3	173240000	153830000	19411000	34647000	30765000	3882200
P62906	P62906	60S ribosomal protein L10a	RPL10A	sp|P62906|RL10A_HUMAN 60S ribosomal protein L10a OS=Homo sapiens OX=9606 GN=RPL10A PE=1 SV=2	1	2	2	2	13.4	24.831	217	12.251	2	1	2	1	2	1	13.4	7.4	68745000	46207000	22539000	5288100	3554400	1733700
P62306	P62306	Small nuclear ribonucleoprotein F	SNRPF	sp|P62306|RUXF_HUMAN Small nuclear ribonucleoprotein F OS=Homo sapiens OX=9606 GN=SNRPF PE=1 SV=1	1	1	1	1	15.1	9.7251	86	11.852	0	1	0	1	0	1	0	15.1	22113000	0	22113000	4422500	0	4422500
Q5TEC6	Q5TEC6	Histone H3-7	H3-7	sp|Q5TEC6|H37_HUMAN Histone H3-7 OS=Homo sapiens OX=9606 GN=H3-7 PE=1 SV=1	1	6	1	1	39	15.43	136	11.756	0	6	0	1	0	1	0	39	248600000	0	248600000	31075000	0	31075000
P15924	P15924	Desmoplakin	DSP	sp|P15924|DESP_HUMAN Desmoplakin OS=Homo sapiens OX=9606 GN=DSP PE=1 SV=3	1	2	2	2	1.1	331.77	2871	11.686	1	1	1	1	1	1	0.8	0.4	14247000	14247000	0	70180	70180	0
A0A0C4DH90;A0A075B6H7;A0A0C4DH55;P01624	A0A0C4DH90;A0A075B6H7;A0A0C4DH55;P01624	Immunoglobulin kappa variable 3/OR2-268 (non-functional) (Fragment);Probable non-functional immunoglobulin kappa variable 3-7	IGKV3OR2-268;	tr|A0A0C4DH90|A0A0C4DH90_HUMAN Immunoglobulin kappa variable 3/OR2-268 (non-functional) (Fragment) OS=Homo sapiens OX=9606 GN=IGKV3OR2-268 PE=4 SV=5;sp|A0A075B6H7|KV37_HUMAN Probable non-functional immunoglobulin kappa variable 3-7 OS=Homo sapiens OX=9606	4	1	1	1	7.8	12.586	116	11.262	1	1	1	1	1	1	7.8	7.8	15315000000	15280000000	35305000	3063100000	3056000000	7060900
P23396	P23396	40S ribosomal protein S3	RPS3	sp|P23396|RS3_HUMAN 40S ribosomal protein S3 OS=Homo sapiens OX=9606 GN=RPS3 PE=1 SV=2	1	1	1	1	4.9	26.688	243	10.293	0	1	0	1	0	1	0	4.9	13490000	0	13490000	709980	0	709980
P62316	P62316	Small nuclear ribonucleoprotein Sm D2	SNRPD2	sp|P62316|SMD2_HUMAN Small nuclear ribonucleoprotein Sm D2 OS=Homo sapiens OX=9606 GN=SNRPD2 PE=1 SV=1	1	1	1	1	16.9	13.527	118	9.9471	0	1	0	1	0	1	0	16.9	8308500	0	8308500	1038600	0	1038600
P62277	P62277	40S ribosomal protein S13	RPS13	sp|P62277|RS13_HUMAN 40S ribosomal protein S13 OS=Homo sapiens OX=9606 GN=RPS13 PE=1 SV=2	1	1	1	1	8.6	17.222	151	9.5969	1	1	1	1	1	1	8.6	8.6	45536000	24999000	20537000	4139600	2272600	1867000
P62304	P62304	Small nuclear ribonucleoprotein E	SNRPE	sp|P62304|RUXE_HUMAN Small nuclear ribonucleoprotein E OS=Homo sapiens OX=9606 GN=SNRPE PE=1 SV=1	1	1	1	1	12	10.803	92	9.4667	0	1	0	1	0	1	0	12	19239000	0	19239000	4809800	0	4809800
Q71UI9;P0C0S5	Q71UI9;P0C0S5	Histone H2A.V;Histone H2A.Z	H2AZ2;H2AZ1	sp|Q71UI9|H2AV_HUMAN Histone H2A.V OS=Homo sapiens OX=9606 GN=H2AZ2 PE=1 SV=3;sp|P0C0S5|H2AZ_HUMAN Histone H2A.Z OS=Homo sapiens OX=9606 GN=H2AZ1 PE=1 SV=2	2	2	1	1	20.3	13.509	128	8.7173	1	2	0	1	0	1	7	20.3	41596000	0	41596000	6932600	0	6932600
P61513	P61513	60S ribosomal protein L37a	RPL37A	sp|P61513|RL37A_HUMAN 60S ribosomal protein L37a OS=Homo sapiens OX=9606 GN=RPL37A PE=1 SV=2	1	1	1	1	19.6	10.275	92	8.1181	0	1	0	1	0	1	0	19.6	36484000	0	36484000	6080600	0	6080600
P0CF74;P15814;A0M8Q6	P0CF74;P15814;A0M8Q6	Immunoglobulin lambda constant 6;Immunoglobulin lambda-like polypeptide 1;	IGLC6;IGLL1;	sp|P0CF74|IGLC6_HUMAN Immunoglobulin lambda constant 6 OS=Homo sapiens OX=9606 GN=IGLC6 PE=1 SV=1;sp|P15814|IGLL1_HUMAN Immunoglobulin lambda-like polypeptide 1 OS=Homo sapiens OX=9606 GN=IGLL1 PE=1 SV=1;sp|A0M8Q6|IGLC7_HUMAN Immunoglobulin lambda constant	3	2	1	1	21.7	11.276	106	7.6082	1	2	0	1	0	1	14.2	21.7	2087400000	0	2087400000	347900000	0	347900000
P13010	P13010	X-ray repair cross-complementing protein 5	XRCC5	sp|P13010|XRCC5_HUMAN X-ray repair cross-complementing protein 5 OS=Homo sapiens OX=9606 GN=XRCC5 PE=1 SV=3	1	1	1	1	1.1	82.704	732	7.5806	0	1	0	1	0	1	0	1.1	0	0	0	0	0	0
Q9NYQ8	Q9NYQ8	Protocadherin Fat 2	FAT2	sp|Q9NYQ8|FAT2_HUMAN Protocadherin Fat 2 OS=Homo sapiens OX=9606 GN=FAT2 PE=1 SV=2	1	1	1	1	0.1	479.31	4349	7.4136	0	1	0	1	0	1	0	0.1	0	0	0	0	0	0
P23258;Q9NRH3	P23258;Q9NRH3	Tubulin gamma-1 chain;Tubulin gamma-2 chain	TUBG1;TUBG2	sp|P23258|TBG1_HUMAN Tubulin gamma-1 chain OS=Homo sapiens OX=9606 GN=TUBG1 PE=1 SV=2;sp|Q9NRH3|TBG2_HUMAN Tubulin gamma-2 chain OS=Homo sapiens OX=9606 GN=TUBG2 PE=2 SV=1	2	1	1	1	2.7	51.169	451	7.3967	0	1	0	1	0	1	0	2.7	21840000	0	21840000	992710	0	992710
A0A0B4J1U7	A0A0B4J1U7	Immunoglobulin heavy variable 6-1	IGHV6-1	sp|A0A0B4J1U7|HV601_HUMAN Immunoglobulin heavy variable 6-1 OS=Homo sapiens OX=9606 GN=IGHV6-1 PE=3 SV=1	1	1	1	1	5.8	13.481	121	7.2924	0	1	0	1	0	1	0	5.8	0	0	0	0	0	0
Q13367	Q13367	AP-3 complex subunit beta-2	AP3B2	sp|Q13367|AP3B2_HUMAN AP-3 complex subunit beta-2 OS=Homo sapiens OX=9606 GN=AP3B2 PE=1 SV=2	1	1	1	1	1.4	119.06	1082	7.0344	0	1	0	1	0	1	0	1.4	35292000	0	35292000	526750	0	526750
Q01469	Q01469	Fatty acid-binding protein 5	FABP5	sp|Q01469|FABP5_HUMAN Fatty acid-binding protein 5 OS=Homo sapiens OX=9606 GN=FABP5 PE=1 SV=3	1	1	1	1	6.7	15.164	135	6.8108	1	1	1	1	1	1	6.7	6.7	33510000	18696000	14814000	3046300	1699700	1346700
Q8TBY8	Q8TBY8	Polyamine-modulated factor 1-binding protein 1	PMFBP1	sp|Q8TBY8|PMFBP_HUMAN Polyamine-modulated factor 1-binding protein 1 OS=Homo sapiens OX=9606 GN=PMFBP1 PE=1 SV=3	1	1	1	1	1.2	117.49	1007	6.8089	0	1	0	1	0	1	0	1.2	125950000	0	125950000	1702000	0	1702000
P23528	P23528	Cofilin-1	CFL1	sp|P23528|COF1_HUMAN Cofilin-1 OS=Homo sapiens OX=9606 GN=CFL1 PE=1 SV=3	1	1	1	1	7.2	18.502	166	6.6939	0	1	0	1	0	1	0	7.2	21174000	0	21174000	1764500	0	1764500
Q7Z2W7	Q7Z2W7	Transient receptor potential cation channel subfamily M member 8	TRPM8	sp|Q7Z2W7|TRPM8_HUMAN Transient receptor potential cation channel subfamily M member 8 OS=Homo sapiens OX=9606 GN=TRPM8 PE=1 SV=2	1	1	1	1	0.7	127.68	1104	6.6774	0	1	0	1	0	1	0	0.7	8618300000	0	8618300000	168990000	0	168990000
P38159;Q96E39	P38159;Q96E39	RNA-binding motif protein, X chromosome;RNA binding motif protein, X-linked-like-1	RBMX;RBMXL1	sp|P38159|RBMX_HUMAN RNA-binding motif protein, X chromosome OS=Homo sapiens OX=9606 GN=RBMX PE=1 SV=3;sp|Q96E39|RMXL1_HUMAN RNA binding motif protein, X-linked-like-1 OS=Homo sapiens OX=9606 GN=RBMXL1 PE=1 SV=1	2	1	1	1	5.4	42.331	391	6.627	0	1	0	1	0	1	0	5.4	26396000	0	26396000	776350	0	776350
O00472	O00472	RNA polymerase II elongation factor ELL2	ELL2	sp|O00472|ELL2_HUMAN RNA polymerase II elongation factor ELL2 OS=Homo sapiens OX=9606 GN=ELL2 PE=1 SV=2	1	1	1	1	2	72.324	640	6.6066	1	1	1	1	1	1	2	2	545240000	92123000	453120000	12982000	2193400	10788000
P19634	P19634	Sodium/hydrogen exchanger 1	SLC9A1	sp|P19634|SL9A1_HUMAN Sodium/hydrogen exchanger 1 OS=Homo sapiens OX=9606 GN=SLC9A1 PE=1 SV=2	1	1	1	1	2.1	90.762	815	6.5718	0	1	0	1	0	1	0	2.1	29596000	0	29596000	954710	0	954710
Q9HCL3	Q9HCL3	Zinc finger protein 14 homolog	ZFP14	sp|Q9HCL3|ZFP14_HUMAN Zinc finger protein 14 homolog OS=Homo sapiens OX=9606 GN=ZFP14 PE=1 SV=2	1	1	1	1	3.6	63.463	533	6.5578	0	1	0	1	0	1	0	3.6	79005000	0	79005000	2394100	0	2394100
P62854	P62854	40S ribosomal protein S26	RPS26	sp|P62854|RS26_HUMAN 40S ribosomal protein S26 OS=Homo sapiens OX=9606 GN=RPS26 PE=1 SV=3	1	1	1	1	13	13.015	115	6.5253	1	1	1	1	1	1	13	13	70331000	39393000	30938000	11722000	6565500	5156400
P62308;A8MWD9	P62308;A8MWD9	Small nuclear ribonucleoprotein G;Putative small nuclear ribonucleoprotein G-like protein 15	SNRPG;SNRPGP15	sp|P62308|RUXG_HUMAN Small nuclear ribonucleoprotein G OS=Homo sapiens OX=9606 GN=SNRPG PE=1 SV=1;sp|A8MWD9|RUXGL_HUMAN Putative small nuclear ribonucleoprotein G-like protein 15 OS=Homo sapiens OX=9606 GN=SNRPGP15 PE=5 SV=2	2	1	1	1	17.1	8.496	76	6.5231	0	1	0	1	0	1	0	17.1	25464000	0	25464000	8488000	0	8488000
P61254;Q9UNX3	P61254;Q9UNX3	60S ribosomal protein L26;60S ribosomal protein L26-like 1	RPL26;RPL26L1	sp|P61254|RL26_HUMAN 60S ribosomal protein L26 OS=Homo sapiens OX=9606 GN=RPL26 PE=1 SV=1;sp|Q9UNX3|RL26L_HUMAN 60S ribosomal protein L26-like 1 OS=Homo sapiens OX=9606 GN=RPL26L1 PE=1 SV=1	2	1	1	1	9.7	17.258	145	6.4259	0	1	0	1	0	1	0	9.7	16582000	0	16582000	1842500	0	1842500
P12270	P12270	Nucleoprotein TPR	TPR	sp|P12270|TPR_HUMAN Nucleoprotein TPR OS=Homo sapiens OX=9606 GN=TPR PE=1 SV=3	1	1	1	1	0.4	267.29	2363	6.4172	0	1	0	1	0	1	0	0.4	3632400	0	3632400	25761	0	25761
Q86UQ4	Q86UQ4	ATP-binding cassette sub-family A member 13	ABCA13	sp|Q86UQ4|ABCAD_HUMAN ATP-binding cassette sub-family A member 13 OS=Homo sapiens OX=9606 GN=ABCA13 PE=2 SV=3	1	1	1	1	0.2	576.15	5058	6.4105	1	1	1	1	1	1	0.2	0.2	6162000000	0	6162000000	22166000	0	22166000
P62273	P62273	40S ribosomal protein S29	RPS29	sp|P62273|RS29_HUMAN 40S ribosomal protein S29 OS=Homo sapiens OX=9606 GN=RPS29 PE=1 SV=2	1	1	1	1	19.6	6.6767	56	6.3647	0	1	0	1	0	1	0	19.6	31051000	0	31051000	7762700	0	7762700
Q08554	Q08554	Desmocollin-1	DSC1	sp|Q08554|DSC1_HUMAN Desmocollin-1 OS=Homo sapiens OX=9606 GN=DSC1 PE=1 SV=2	1	1	1	1	1.2	99.986	894	6.2966	1	1	1	1	1	1	1.2	1.2	21729000	0	21729000	426050	0	426050
Q8IV04	Q8IV04	Carabin	TBC1D10C	sp|Q8IV04|TB10C_HUMAN Carabin OS=Homo sapiens OX=9606 GN=TBC1D10C PE=1 SV=1	1	1	1	1	2	49.712	446	6.224	0	1	0	1	0	1	0	2	57423000	0	57423000	2610100	0	2610100
P62328	P62328	Thymosin beta-4	TMSB4X	sp|P62328|TYB4_HUMAN Thymosin beta-4 OS=Homo sapiens OX=9606 GN=TMSB4X PE=1 SV=2	1	1	1	1	25	5.0526	44	6.2057	0	1	0	1	0	1	0	25	59993000	0	59993000	14998000	0	14998000
P62847	P62847	40S ribosomal protein S24	RPS24	sp|P62847|RS24_HUMAN 40S ribosomal protein S24 OS=Homo sapiens OX=9606 GN=RPS24 PE=1 SV=1	1	1	1	1	9	15.423	133	6.1123	0	1	0	1	0	1	0	9	4036000	0	4036000	576580	0	576580
Q96QV6;Q8IUE6;P16104	Q96QV6;Q8IUE6;P16104	Histone H2A type 1-A;Histone H2A type 2-B;Histone H2AX	H2AC1;H2AC21;H2AX	sp|Q96QV6|H2A1A_HUMAN Histone H2A type 1-A OS=Homo sapiens OX=9606 GN=H2AC1 PE=1 SV=3;sp|Q8IUE6|H2A2B_HUMAN Histone H2A type 2-B OS=Homo sapiens OX=9606 GN=H2AC21 PE=1 SV=3;sp|P16104|H2AX_HUMAN Histone H2AX OS=Homo sapiens OX=9606 GN=H2AX PE=1 SV=2	3	4	1	1	39.7	14.233	131	6.0783	1	4	0	1	0	1	6.9	39.7	10425000	0	10425000	1489300	0	1489300
P02790	P02790	Hemopexin	HPX	sp|P02790|HEMO_HUMAN Hemopexin OS=Homo sapiens OX=9606 GN=HPX PE=1 SV=2	1	1	1	1	2.4	51.676	462	6.0448	0	1	0	1	0	1	0	2.4	18002000	0	18002000	692380	0	692380
Q07666	Q07666	KH domain-containing, RNA-binding, signal transduction-associated protein 1	KHDRBS1	sp|Q07666|KHDR1_HUMAN KH domain-containing, RNA-binding, signal transduction-associated protein 1 OS=Homo sapiens OX=9606 GN=KHDRBS1 PE=1 SV=1	1	1	1	1	2.5	48.227	443	6.0366	0	1	0	1	0	1	0	2.5	5297700	0	5297700	252270	0	252270
Q14103	Q14103	Heterogeneous nuclear ribonucleoprotein D0	HNRNPD	sp|Q14103|HNRPD_HUMAN Heterogeneous nuclear ribonucleoprotein D0 OS=Homo sapiens OX=9606 GN=HNRNPD PE=1 SV=1	1	1	1	1	3.9	38.434	355	6.0149	0	1	0	1	0	1	0	3.9	10871000	0	10871000	724760	0	724760
P06312	P06312	Immunoglobulin kappa variable 4-1	IGKV4-1	sp|P06312|KV401_HUMAN Immunoglobulin kappa variable 4-1 OS=Homo sapiens OX=9606 GN=IGKV4-1 PE=1 SV=1	1	1	1	1	12.4	13.38	121	5.9989	0	1	0	1	0	1	0	12.4	173240000	0	173240000	28873000	0	28873000
Q5BKY9;Q8N9E0	Q5BKY9;Q8N9E0	Protein FAM133B;Protein FAM133A	FAM133B;FAM133A	sp|Q5BKY9|F133B_HUMAN Protein FAM133B OS=Homo sapiens OX=9606 GN=FAM133B PE=1 SV=1;sp|Q8N9E0|F133A_HUMAN Protein FAM133A OS=Homo sapiens OX=9606 GN=FAM133A PE=1 SV=1	2	1	1	1	4.5	28.385	247	5.9196	1	1	1	1	1	1	4.5	4.5	18666000	18666000	0	1696900	1696900	0
Q8NHW3;Q9Y5Q3	Q8NHW3;Q9Y5Q3	Transcription factor MafA;Transcription factor MafB	MAFA;MAFB	sp|Q8NHW3|MAFA_HUMAN Transcription factor MafA OS=Homo sapiens OX=9606 GN=MAFA PE=1 SV=2;sp|Q9Y5Q3|MAFB_HUMAN Transcription factor MafB OS=Homo sapiens OX=9606 GN=MAFB PE=1 SV=2	2	1	1	1	3.4	36.982	353	5.886	1	1	1	1	1	1	3.4	3.4	101820000	18398000	83422000	11313000	2044200	9269100
Q8N8K9	Q8N8K9	Uncharacterized protein KIAA1958	KIAA1958	sp|Q8N8K9|K1958_HUMAN Uncharacterized protein KIAA1958 OS=Homo sapiens OX=9606 GN=KIAA1958 PE=1 SV=1	1	1	1	1	1	79.211	716	5.8838	0	1	0	1	0	1	0	1	0	0	0	0	0	0
O43300	O43300	Leucine-rich repeat transmembrane neuronal protein 2	LRRTM2	sp|O43300|LRRT2_HUMAN Leucine-rich repeat transmembrane neuronal protein 2 OS=Homo sapiens OX=9606 GN=LRRTM2 PE=1 SV=3	1	1	1	1	2.9	59.076	516	5.8679	0	1	0	1	0	1	0	2.9	18268000	0	18268000	589290	0	589290
O60721	O60721	Sodium/potassium/calcium exchanger 1	SLC24A1	sp|O60721|NCKX1_HUMAN Sodium/potassium/calcium exchanger 1 OS=Homo sapiens OX=9606 GN=SLC24A1 PE=1 SV=1	1	1	1	1	0.6	121.37	1099	5.8537	0	1	0	1	0	1	0	0.6	0	0	0	0	0	0
P68371;P04350;Q9BUF5;Q3ZCM7;Q9H4B7;A6NNZ2	P68371;P04350	Tubulin beta-4B chain;Tubulin beta-4A chain	TUBB4B;TUBB4A	sp|P68371|TBB4B_HUMAN Tubulin beta-4B chain OS=Homo sapiens OX=9606 GN=TUBB4B PE=1 SV=1;sp|P04350|TBB4A_HUMAN Tubulin beta-4A chain OS=Homo sapiens OX=9606 GN=TUBB4A PE=1 SV=2	6	5	1	1	16	49.83	445	5.8067	1	4	0	1	0	1	5.8	10.1	11228000	0	11228000	510360	0	510360
Q9ULD9	Q9ULD9	Zinc finger protein 608	ZNF608	sp|Q9ULD9|ZN608_HUMAN Zinc finger protein 608 OS=Homo sapiens OX=9606 GN=ZNF608 PE=1 SV=4	1	1	1	1	0.9	162.21	1512	5.7913	0	1	0	1	0	1	0	0.9	42443000	0	42443000	633480	0	633480
Q2M3M2	Q2M3M2	Sodium/glucose cotransporter 4	SLC5A9	sp|Q2M3M2|SC5A9_HUMAN Sodium/glucose cotransporter 4 OS=Homo sapiens OX=9606 GN=SLC5A9 PE=1 SV=2	1	1	1	1	5.6	74.072	681	5.7864	0	1	0	1	0	1	0	5.6	21110000	0	21110000	879590	0	879590
P05386	P05386	60S acidic ribosomal protein P1	RPLP1	sp|P05386|RLA1_HUMAN 60S acidic ribosomal protein P1 OS=Homo sapiens OX=9606 GN=RPLP1 PE=1 SV=1	1	1	1	1	14	11.514	114	5.7491	0	1	0	1	0	1	0	14	0	0	0	0	0	0
Q68E01	Q68E01	Integrator complex subunit 3	INTS3	sp|Q68E01|INT3_HUMAN Integrator complex subunit 3 OS=Homo sapiens OX=9606 GN=INTS3 PE=1 SV=1	1	1	1	1	1.1	118.07	1043	5.7433	0	1	0	1	0	1	0	1.1	15925000	0	15925000	279380	0	279380
P04196	P04196	Histidine-rich glycoprotein	HRG	sp|P04196|HRG_HUMAN Histidine-rich glycoprotein OS=Homo sapiens OX=9606 GN=HRG PE=1 SV=1	1	1	1	1	1.9	59.578	525	5.7252	0	1	0	1	0	1	0	1.9	18851000	0	18851000	897670	0	897670
Q8N257	Q8N257	Histone H2B type 3-B	H2BU1	sp|Q8N257|H2B3B_HUMAN Histone H2B type 3-B OS=Homo sapiens OX=9606 GN=H2BU1 PE=1 SV=3	1	5	1	1	46	13.908	126	5.7102	3	4	0	1	0	1	36.5	42.1	26182000	0	26182000	2380200	0	2380200
Q5T749	Q5T749	Keratinocyte proline-rich protein	KPRP	sp|Q5T749|KPRP_HUMAN Keratinocyte proline-rich protein OS=Homo sapiens OX=9606 GN=KPRP PE=1 SV=1	1	1	1	1	1.2	64.135	579	5.702	1	1	1	1	1	1	1.2	1.2	21657000	9013700	12643000	698610	290760	407850
P00738	P00738	Haptoglobin	HP	sp|P00738|HPT_HUMAN Haptoglobin OS=Homo sapiens OX=9606 GN=HP PE=1 SV=1	1	1	1	1	2.2	45.205	406	5.6903	0	1	0	1	0	1	0	2.2	24093000	0	24093000	1003900	0	1003900
Q96T60	Q96T60	Bifunctional polynucleotide phosphatase/kinase	PNKP	sp|Q96T60|PNKP_HUMAN Bifunctional polynucleotide phosphatase/kinase OS=Homo sapiens OX=9606 GN=PNKP PE=1 SV=1	1	1	1	1	2.5	57.076	521	5.6444	0	1	0	1	0	1	0	2.5	7104200	0	7104200	202980	0	202980
P26641	P26641	Elongation factor 1-gamma	EEF1G	sp|P26641|EF1G_HUMAN Elongation factor 1-gamma OS=Homo sapiens OX=9606 GN=EEF1G PE=1 SV=3	1	1	1	1	3	50.118	437	5.6315	0	1	0	1	0	1	0	3	7590800	0	7590800	291960	0	291960
Q495C1	Q495C1	Probable E3 SUMO-protein ligase RNF212	RNF212	sp|Q495C1|RN212_HUMAN Probable E3 SUMO-protein ligase RNF212 OS=Homo sapiens OX=9606 GN=RNF212 PE=2 SV=1	1	1	1	1	3.7	33.364	297	5.596	0	1	0	1	0	1	0	3.7	0	0	0	0	0	0
Q12830	Q12830	Nucleosome-remodeling factor subunit BPTF	BPTF	sp|Q12830|BPTF_HUMAN Nucleosome-remodeling factor subunit BPTF OS=Homo sapiens OX=9606 GN=BPTF PE=1 SV=3	1	1	1	1	0.3	338.26	3046	5.5952	0	1	0	1	0	1	0	0.3	0	0	0	0	0	0
Q8WV22	Q8WV22	Non-structural maintenance of chromosomes element 1 homolog	NSMCE1	sp|Q8WV22|NSE1_HUMAN Non-structural maintenance of chromosomes element 1 homolog OS=Homo sapiens OX=9606 GN=NSMCE1 PE=1 SV=5	1	1	1	1	3.8	30.855	266	-2	0	1	0	1	0	1	0	3.8	16751000	0	16751000	837540	0	837540
Q5VST9	Q5VST9	Obscurin	OBSCN	sp|Q5VST9|OBSCN_HUMAN Obscurin OS=Homo sapiens OX=9606 GN=OBSCN PE=1 SV=3	1	1	1	1	0.2	868.47	7968	-2	0	1	0	1	0	1	0	0.2	441280000	0	441280000	989410	0	989410
Q9Y6I7	Q9Y6I7	WD repeat and SOCS box-containing protein 1	WSB1	sp|Q9Y6I7|WSB1_HUMAN WD repeat and SOCS box-containing protein 1 OS=Homo sapiens OX=9606 GN=WSB1 PE=1 SV=1	1	1	1	1	1.7	47.432	421	-2	0	1	0	1	0	1	0	1.7	32956000	0	32956000	1647800	0	1647800
P01859	P01859	Immunoglobulin heavy constant gamma 2	IGHG2	sp|P01859|IGHG2_HUMAN Immunoglobulin heavy constant gamma 2 OS=Homo sapiens OX=9606 GN=IGHG2 PE=1 SV=2	1	5	5	1	17.5	35.9	326	323.31	3	2	3	2	1	0	15.3	9.2	61722000000	933360000	60789000000	4747800000	71797000	4676000000
Q14498;Q86U06	Q14498	RNA-binding protein 39	RBM39	sp|Q14498|RBM39_HUMAN RNA-binding protein 39 OS=Homo sapiens OX=9606 GN=RBM39 PE=1 SV=2	2	8	8	8	21.3	59.379	530	323.31	8	0	8	0	8	0	21.3	0	216900000	216900000	0	8342400	8342400	0
P35580	P35580	Myosin-10	MYH10	sp|P35580|MYH10_HUMAN Myosin-10 OS=Homo sapiens OX=9606 GN=MYH10 PE=1 SV=3	1	20	17	17	13.3	229	1976	204.36	20	0	17	0	17	0	13.3	0	326220000	326220000	0	2568700	2568700	0
A0A0A0MRZ8;P04433	A0A0A0MRZ8;P04433	Immunoglobulin kappa variable 3D-11;Immunoglobulin kappa variable 3-11	IGKV3D-11;IGKV3-11	sp|A0A0A0MRZ8|KVD11_HUMAN Immunoglobulin kappa variable 3D-11 OS=Homo sapiens OX=9606 GN=IGKV3D-11 PE=3 SV=6;sp|P04433|KV311_HUMAN Immunoglobulin kappa variable 3-11 OS=Homo sapiens OX=9606 GN=IGKV3-11 PE=1 SV=1	2	1	1	1	7.8	12.625	115	167.25	1	0	1	0	1	0	7.8	0	5164600000	5164600000	0	860770000	860770000	0
Q9Y2W1	Q9Y2W1	Thyroid hormone receptor-associated protein 3	THRAP3	sp|Q9Y2W1|TR150_HUMAN Thyroid hormone receptor-associated protein 3 OS=Homo sapiens OX=9606 GN=THRAP3 PE=1 SV=2	1	7	7	7	10.4	108.66	955	156.86	7	0	7	0	7	0	10.4	0	439580000	439580000	0	7578900	7578900	0
Q9Y383	Q9Y383	Putative RNA-binding protein Luc7-like 2	LUC7L2	sp|Q9Y383|LC7L2_HUMAN Putative RNA-binding protein Luc7-like 2 OS=Homo sapiens OX=9606 GN=LUC7L2 PE=1 SV=2	1	12	12	8	34.7	46.513	392	152.85	12	0	12	0	8	0	34.7	0	730330000	730330000	0	38439000	38439000	0
B9A064;P0DOY3;P0DOY2;P0CG04	B9A064;P0DOY3;P0DOY2;P0CG04	Immunoglobulin lambda-like polypeptide 5;Immunoglobulin lambda constant 3;	IGLL5;IGLC3;	sp|B9A064|IGLL5_HUMAN Immunoglobulin lambda-like polypeptide 5 OS=Homo sapiens OX=9606 GN=IGLL5 PE=2 SV=2;sp|P0DOY3|IGLC3_HUMAN Immunoglobulin lambda constant 3 OS=Homo sapiens OX=9606 GN=IGLC3 PE=1 SV=1;sp|P0DOY2|IGLC2_HUMAN Immunoglobulin lambda constant	4	2	2	1	10.7	23.063	214	127.66	2	1	2	1	1	0	10.7	7	2088900000	1987000000	101950000	160680000	152840000	7842500
O95479	O95479	GDH/6PGL endoplasmic bifunctional protein	H6PD	sp|O95479|G6PE_HUMAN GDH/6PGL endoplasmic bifunctional protein OS=Homo sapiens OX=9606 GN=H6PD PE=1 SV=2	1	5	5	5	11.8	88.892	791	102.31	5	0	5	0	5	0	11.8	0	66203000	66203000	0	1504600	1504600	0
P10412;P16402;Q02539;P16401;P22492	P10412;P16402;Q02539	Histone H1.4;Histone H1.3;Histone H1.1	H1-4;H1-3;H1-1	sp|P10412|H14_HUMAN Histone H1.4 OS=Homo sapiens OX=9606 GN=H1-4 PE=1 SV=2;sp|P16402|H13_HUMAN Histone H1.3 OS=Homo sapiens OX=9606 GN=H1-3 PE=1 SV=2;sp|Q02539|H11_HUMAN Histone H1.1 OS=Homo sapiens OX=9606 GN=H1-1 PE=1 SV=3	5	8	8	1	38.4	21.865	219	98.614	6	5	6	5	1	0	38.4	18.7	1092300000	735000000	357290000	91024000	61250000	29774000
Q01130	Q01130	Serine/arginine-rich splicing factor 2	SRSF2	sp|Q01130|SRSF2_HUMAN Serine/arginine-rich splicing factor 2 OS=Homo sapiens OX=9606 GN=SRSF2 PE=1 SV=4	1	2	2	2	14.9	25.476	221	90.884	2	0	2	0	2	0	14.9	0	108960000	108960000	0	9905100	9905100	0
Q86V81	Q86V81	THO complex subunit 4	ALYREF	sp|Q86V81|THOC4_HUMAN THO complex subunit 4 OS=Homo sapiens OX=9606 GN=ALYREF PE=1 SV=3	1	5	5	5	28.8	26.888	257	82.878	5	0	5	0	5	0	28.8	0	230800000	230800000	0	15386000	15386000	0
Q7L014	Q7L014	Probable ATP-dependent RNA helicase DDX46	DDX46	sp|Q7L014|DDX46_HUMAN Probable ATP-dependent RNA helicase DDX46 OS=Homo sapiens OX=9606 GN=DDX46 PE=1 SV=2	1	7	7	7	9.4	117.36	1031	81.08	7	0	7	0	7	0	9.4	0	203840000	203840000	0	3455000	3455000	0
P84103	P84103	Serine/arginine-rich splicing factor 3	SRSF3	sp|P84103|SRSF3_HUMAN Serine/arginine-rich splicing factor 3 OS=Homo sapiens OX=9606 GN=SRSF3 PE=1 SV=1	1	5	5	5	39.6	19.329	164	79.052	5	0	5	0	5	0	39.6	0	180540000	180540000	0	20061000	20061000	0
Q9NWB6	Q9NWB6	Arginine and glutamate-rich protein 1	ARGLU1	sp|Q9NWB6|ARGL1_HUMAN Arginine and glutamate-rich protein 1 OS=Homo sapiens OX=9606 GN=ARGLU1 PE=1 SV=1	1	4	4	4	15.8	33.216	273	66.548	4	0	4	0	4	0	15.8	0	210680000	210680000	0	14045000	14045000	0
P62750	P62750	60S ribosomal protein L23a	RPL23A	sp|P62750|RL23A_HUMAN 60S ribosomal protein L23a OS=Homo sapiens OX=9606 GN=RPL23A PE=1 SV=1	1	2	2	2	16	17.695	156	62.943	2	0	2	0	2	0	16	0	54097000	54097000	0	6010800	6010800	0
Q01081;Q8WU68	Q01081;Q8WU68	Splicing factor U2AF 35 kDa subunit;Splicing factor U2AF 26 kDa subunit	U2AF1;U2AF1L4	sp|Q01081|U2AF1_HUMAN Splicing factor U2AF 35 kDa subunit OS=Homo sapiens OX=9606 GN=U2AF1 PE=1 SV=3;sp|Q8WU68|U2AF4_HUMAN Splicing factor U2AF 26 kDa subunit OS=Homo sapiens OX=9606 GN=U2AF1L4 PE=1 SV=2	2	4	4	4	25	27.872	240	47.098	4	0	4	0	4	0	25	0	106460000	106460000	0	8871900	8871900	0
Q9NYF8	Q9NYF8	Bcl-2-associated transcription factor 1	BCLAF1	sp|Q9NYF8|BCLF1_HUMAN Bcl-2-associated transcription factor 1 OS=Homo sapiens OX=9606 GN=BCLAF1 PE=1 SV=2	1	6	6	6	8.6	106.12	920	44.013	6	0	6	0	6	0	8.6	0	151830000	151830000	0	3036700	3036700	0
Q05519	Q05519	Serine/arginine-rich splicing factor 11	SRSF11	sp|Q05519|SRS11_HUMAN Serine/arginine-rich splicing factor 11 OS=Homo sapiens OX=9606 GN=SRSF11 PE=1 SV=1	1	3	3	3	10.7	53.542	484	40.535	3	0	3	0	3	0	10.7	0	94324000	94324000	0	5895300	5895300	0
Q02878	Q02878	60S ribosomal protein L6	RPL6	sp|Q02878|RL6_HUMAN 60S ribosomal protein L6 OS=Homo sapiens OX=9606 GN=RPL6 PE=1 SV=3	1	2	2	2	11.1	32.728	288	40.407	2	0	2	0	2	0	11.1	0	53039000	53039000	0	2946600	2946600	0
Q07955	Q07955	Serine/arginine-rich splicing factor 1	SRSF1	sp|Q07955|SRSF1_HUMAN Serine/arginine-rich splicing factor 1 OS=Homo sapiens OX=9606 GN=SRSF1 PE=1 SV=2	1	3	3	3	15.3	27.744	248	38.61	3	0	3	0	3	0	15.3	0	57847000	57847000	0	3856500	3856500	0
Q9UHX1	Q9UHX1	Poly(U)-binding-splicing factor PUF60	PUF60	sp|Q9UHX1|PUF60_HUMAN Poly(U)-binding-splicing factor PUF60 OS=Homo sapiens OX=9606 GN=PUF60 PE=1 SV=1	1	3	3	3	8.1	59.875	559	37.091	3	0	3	0	3	0	8.1	0	81863000	81863000	0	2728800	2728800	0
P22087;A6NHQ2	P22087	rRNA 2-O-methyltransferase fibrillarin	FBL	sp|P22087|FBRL_HUMAN rRNA 2-O-methyltransferase fibrillarin OS=Homo sapiens OX=9606 GN=FBL PE=1 SV=2	2	5	5	5	17.4	33.784	321	36.153	5	0	5	0	5	0	17.4	0	115770000	115770000	0	5033400	5033400	0
Q86YZ3	Q86YZ3	Hornerin	HRNR	sp|Q86YZ3|HORN_HUMAN Hornerin OS=Homo sapiens OX=9606 GN=HRNR PE=1 SV=2	1	1	1	1	2.7	282.39	2850	35.919	1	0	1	0	1	0	2.7	0	39405000	39405000	0	378900	378900	0
P04004	P04004	Vitronectin	VTN	sp|P04004|VTNC_HUMAN Vitronectin OS=Homo sapiens OX=9606 GN=VTN PE=1 SV=1	1	3	3	3	6.1	54.305	478	34.619	3	0	3	0	3	0	6.1	0	101570000	101570000	0	3761800	3761800	0
P01861	P01861	Immunoglobulin heavy constant gamma 4	IGHG4	sp|P01861|IGHG4_HUMAN Immunoglobulin heavy constant gamma 4 OS=Homo sapiens OX=9606 GN=IGHG4 PE=1 SV=1	1	4	2	2	15	35.94	327	28.34	3	1	2	0	2	0	12.8	2.1	1486900000	1486900000	0	106210000	106210000	0
Q6PKX4	Q6PKX4	Docking protein 6	DOK6	sp|Q6PKX4|DOK6_HUMAN Docking protein 6 OS=Homo sapiens OX=9606 GN=DOK6 PE=1 SV=1	1	1	1	1	1.8	38.317	331	27.489	1	0	1	0	1	0	1.8	0	942750000	942750000	0	49618000	49618000	0
O95232	O95232	Luc7-like protein 3	LUC7L3	sp|O95232|LC7L3_HUMAN Luc7-like protein 3 OS=Homo sapiens OX=9606 GN=LUC7L3 PE=1 SV=2	1	3	3	3	9.5	51.466	432	26.942	3	0	3	0	3	0	9.5	0	33698000	33698000	0	1604700	1604700	0
O95218	O95218	Zinc finger Ran-binding domain-containing protein 2	ZRANB2	sp|O95218|ZRAB2_HUMAN Zinc finger Ran-binding domain-containing protein 2 OS=Homo sapiens OX=9606 GN=ZRANB2 PE=1 SV=2	1	4	4	4	12.1	37.404	330	24.689	4	0	4	0	4	0	12.1	0	149960000	149960000	0	7892800	7892800	0
Q14978	Q14978	Nucleolar and coiled-body phosphoprotein 1	NOLC1	sp|Q14978|NOLC1_HUMAN Nucleolar and coiled-body phosphoprotein 1 OS=Homo sapiens OX=9606 GN=NOLC1 PE=1 SV=2	1	1	1	1	1.6	73.602	699	24.25	1	0	1	0	1	0	1.6	0	22826000	22826000	0	543480	543480	0
P01701	P01701	Immunoglobulin lambda variable 1-51	IGLV1-51	sp|P01701|LV151_HUMAN Immunoglobulin lambda variable 1-51 OS=Homo sapiens OX=9606 GN=IGLV1-51 PE=1 SV=2	1	3	3	3	17.9	12.249	117	20.355	3	0	3	0	3	0	17.9	0	1445200000	1445200000	0	481740000	481740000	0
P26368	P26368	Splicing factor U2AF 65 kDa subunit	U2AF2	sp|P26368|U2AF2_HUMAN Splicing factor U2AF 65 kDa subunit OS=Homo sapiens OX=9606 GN=U2AF2 PE=1 SV=4	1	3	3	3	8.2	53.5	475	19.787	3	0	3	0	3	0	8.2	0	64177000	64177000	0	3377700	3377700	0
A0A0B4J1V6;A0A0A0MS15	A0A0B4J1V6;A0A0A0MS15	Immunoglobulin heavy variable 3-73;Immunoglobulin heavy variable 3-49	IGHV3-73;IGHV3-49	sp|A0A0B4J1V6|HV373_HUMAN Immunoglobulin heavy variable 3-73 OS=Homo sapiens OX=9606 GN=IGHV3-73 PE=3 SV=1;sp|A0A0A0MS15|HV349_HUMAN Immunoglobulin heavy variable 3-49 OS=Homo sapiens OX=9606 GN=IGHV3-49 PE=3 SV=1	2	1	1	1	9.2	12.858	119	19.654	1	0	1	0	1	0	9.2	0	6728200000	6728200000	0	961180000	961180000	0
Q13247	Q13247	Serine/arginine-rich splicing factor 6	SRSF6	sp|Q13247|SRSF6_HUMAN Serine/arginine-rich splicing factor 6 OS=Homo sapiens OX=9606 GN=SRSF6 PE=1 SV=2	1	2	2	2	6.7	39.586	344	18.691	2	0	2	0	2	0	6.7	0	35120000	35120000	0	1756000	1756000	0
P19105;O14950;P24844	P19105;O14950	Myosin regulatory light chain 12A;Myosin regulatory light chain 12B	MYL12A;MYL12B	sp|P19105|ML12A_HUMAN Myosin regulatory light chain 12A OS=Homo sapiens OX=9606 GN=MYL12A PE=1 SV=2;sp|O14950|ML12B_HUMAN Myosin regulatory light chain 12B OS=Homo sapiens OX=9606 GN=MYL12B PE=1 SV=2	3	3	3	3	24.6	19.794	171	18.611	3	0	3	0	3	0	24.6	0	29772000	29772000	0	2706600	2706600	0
Q66PJ3	Q66PJ3	ADP-ribosylation factor-like protein 6-interacting protein 4	ARL6IP4	sp|Q66PJ3|AR6P4_HUMAN ADP-ribosylation factor-like protein 6-interacting protein 4 OS=Homo sapiens OX=9606 GN=ARL6IP4 PE=1 SV=3	1	2	2	2	13.9	26.374	237	17.298	2	0	2	0	2	0	13.9	0	46587000	46587000	0	4658700	4658700	0
Q9Y2S6	Q9Y2S6	Translation machinery-associated protein 7	TMA7	sp|Q9Y2S6|TMA7_HUMAN Translation machinery-associated protein 7 OS=Homo sapiens OX=9606 GN=TMA7 PE=1 SV=1	1	2	2	2	40.6	7.0662	64	17.053	2	0	2	0	2	0	40.6	0	107910000	107910000	0	53955000	53955000	0
P06727	P06727	Apolipoprotein A-IV	APOA4	sp|P06727|APOA4_HUMAN Apolipoprotein A-IV OS=Homo sapiens OX=9606 GN=APOA4 PE=1 SV=4	1	2	2	2	3	45.371	396	16.863	2	0	2	0	2	0	3	0	58415000	58415000	0	2014300	2014300	0
O60884	O60884	DnaJ homolog subfamily A member 2	DNAJA2	sp|O60884|DNJA2_HUMAN DnaJ homolog subfamily A member 2 OS=Homo sapiens OX=9606 GN=DNAJA2 PE=1 SV=1	1	2	2	2	10.9	45.745	412	15.056	2	0	2	0	2	0	10.9	0	24254000	24254000	0	970150	970150	0
Q5VTL8	Q5VTL8	Pre-mRNA-splicing factor 38B	PRPF38B	sp|Q5VTL8|PR38B_HUMAN Pre-mRNA-splicing factor 38B OS=Homo sapiens OX=9606 GN=PRPF38B PE=1 SV=1	1	2	2	2	4.4	64.467	546	14.651	2	0	2	0	2	0	4.4	0	0	0	0	0	0	0
P35268	P35268	60S ribosomal protein L22	RPL22	sp|P35268|RL22_HUMAN 60S ribosomal protein L22 OS=Homo sapiens OX=9606 GN=RPL22 PE=1 SV=2	1	2	2	2	18.8	14.787	128	13.639	2	0	2	0	2	0	18.8	0	43882000	43882000	0	7313700	7313700	0
Q8N9Q2	Q8N9Q2	Protein SREK1IP1	SREK1IP1	sp|Q8N9Q2|SR1IP_HUMAN Protein SREK1IP1 OS=Homo sapiens OX=9606 GN=SREK1IP1 PE=1 SV=1	1	2	2	2	14.8	18.177	155	13.343	2	0	2	0	2	0	14.8	0	91659000	91659000	0	13094000	13094000	0
P30050	P30050	60S ribosomal protein L12	RPL12	sp|P30050|RL12_HUMAN 60S ribosomal protein L12 OS=Homo sapiens OX=9606 GN=RPL12 PE=1 SV=1	1	2	2	2	18.2	17.818	165	13.155	2	0	2	0	2	0	18.2	0	30093000	30093000	0	2735700	2735700	0
Q8WXA9	Q8WXA9	Splicing regulatory glutamine/lysine-rich protein 1	SREK1	sp|Q8WXA9|SREK1_HUMAN Splicing regulatory glutamine/lysine-rich protein 1 OS=Homo sapiens OX=9606 GN=SREK1 PE=1 SV=1	1	1	1	1	2.8	59.38	508	12.969	1	0	1	0	1	0	2.8	0	13537000	13537000	0	966900	966900	0
P40429;Q6NVV1	P40429;Q6NVV1	60S ribosomal protein L13a;Putative 60S ribosomal protein L13a protein RPL13AP3	RPL13A;RPL13AP3	sp|P40429|RL13A_HUMAN 60S ribosomal protein L13a OS=Homo sapiens OX=9606 GN=RPL13A PE=1 SV=2;sp|Q6NVV1|R13P3_HUMAN Putative 60S ribosomal protein L13a protein RPL13AP3 OS=Homo sapiens OX=9606 GN=RPL13AP3 PE=5 SV=1	2	2	2	2	10.8	23.577	203	12.867	2	0	2	0	2	0	10.8	0	34373000	34373000	0	2021900	2021900	0
P18124	P18124	60S ribosomal protein L7	RPL7	sp|P18124|RL7_HUMAN 60S ribosomal protein L7 OS=Homo sapiens OX=9606 GN=RPL7 PE=1 SV=1	1	2	2	2	15.3	29.225	248	12.789	2	0	2	0	2	0	15.3	0	25768000	25768000	0	1610500	1610500	0
Q9H307	Q9H307	Pinin	PNN	sp|Q9H307|PININ_HUMAN Pinin OS=Homo sapiens OX=9606 GN=PNN PE=1 SV=5	1	2	2	2	3.9	81.627	717	11.669	2	0	2	0	2	0	3.9	0	57350000	57350000	0	1333700	1333700	0
Q08170	Q08170	Serine/arginine-rich splicing factor 4	SRSF4	sp|Q08170|SRSF4_HUMAN Serine/arginine-rich splicing factor 4 OS=Homo sapiens OX=9606 GN=SRSF4 PE=1 SV=2	1	2	2	2	5.7	56.678	494	11.597	2	0	2	0	2	0	5.7	0	21792000	21792000	0	1089600	1089600	0
Q8IVF5	Q8IVF5	Rho guanine nucleotide exchange factor TIAM2	TIAM2	sp|Q8IVF5|TIAM2_HUMAN Rho guanine nucleotide exchange factor TIAM2 OS=Homo sapiens OX=9606 GN=TIAM2 PE=2 SV=4	1	2	2	2	1.1	190.1	1701	11.476	2	0	2	0	2	0	1.1	0	428010000	428010000	0	4280100	4280100	0
P18583	P18583	Protein SON	SON	sp|P18583|SON_HUMAN Protein SON OS=Homo sapiens OX=9606 GN=SON PE=1 SV=4	1	2	2	2	1.5	263.83	2426	11.44	2	0	2	0	2	0	1.5	0	49468000	49468000	0	603270	603270	0
Q6P5R6	Q6P5R6	60S ribosomal protein L22-like 1	RPL22L1	sp|Q6P5R6|RL22L_HUMAN 60S ribosomal protein L22-like 1 OS=Homo sapiens OX=9606 GN=RPL22L1 PE=1 SV=2	1	2	2	2	19.7	14.606	122	11.41	2	0	2	0	2	0	19.7	0	48410000	48410000	0	8068400	8068400	0
P01619	P01619	Immunoglobulin kappa variable 3-20	IGKV3-20	sp|P01619|KV320_HUMAN Immunoglobulin kappa variable 3-20 OS=Homo sapiens OX=9606 GN=IGKV3-20 PE=1 SV=2	1	1	1	1	7.8	12.557	116	11.262	1	0	1	0	1	0	7.8	0	1117000000	1117000000	0	159580000	159580000	0
Q9Y3U8	Q9Y3U8	60S ribosomal protein L36	RPL36	sp|Q9Y3U8|RL36_HUMAN 60S ribosomal protein L36 OS=Homo sapiens OX=9606 GN=RPL36 PE=1 SV=3	1	2	2	2	21	12.254	105	11.162	2	0	2	0	2	0	21	0	0	0	0	0	0	0
Q15233	Q15233	Non-POU domain-containing octamer-binding protein	NONO	sp|Q15233|NONO_HUMAN Non-POU domain-containing octamer-binding protein OS=Homo sapiens OX=9606 GN=NONO PE=1 SV=4	1	2	2	2	5.1	54.231	471	10.941	2	0	2	0	2	0	5.1	0	11146000	11146000	0	428700	428700	0
Q7L4I2	Q7L4I2	Arginine/serine-rich coiled-coil protein 2	RSRC2	sp|Q7L4I2|RSRC2_HUMAN Arginine/serine-rich coiled-coil protein 2 OS=Homo sapiens OX=9606 GN=RSRC2 PE=1 SV=1	1	1	1	1	2.3	50.559	434	9.8133	1	0	1	0	1	0	2.3	0	24298000	24298000	0	1278800	1278800	0
Q92841	Q92841	Probable ATP-dependent RNA helicase DDX17	DDX17	sp|Q92841|DDX17_HUMAN Probable ATP-dependent RNA helicase DDX17 OS=Homo sapiens OX=9606 GN=DDX17 PE=1 SV=2	1	1	1	1	1.5	80.272	729	9.4848	1	0	1	0	1	0	1.5	0	18944000	18944000	0	462060	462060	0
Q8NAV1	Q8NAV1	Pre-mRNA-splicing factor 38A	PRPF38A	sp|Q8NAV1|PR38A_HUMAN Pre-mRNA-splicing factor 38A OS=Homo sapiens OX=9606 GN=PRPF38A PE=1 SV=1	1	1	1	1	3.8	37.476	312	9.418	1	0	1	0	1	0	3.8	0	19535000	19535000	0	1302300	1302300	0
P01709;P01706	P01709;P01706	Immunoglobulin lambda variable 2-8;Immunoglobulin lambda variable 2-11	IGLV2-8;IGLV2-11	sp|P01709|LV208_HUMAN Immunoglobulin lambda variable 2-8 OS=Homo sapiens OX=9606 GN=IGLV2-8 PE=1 SV=2;sp|P01706|LV211_HUMAN Immunoglobulin lambda variable 2-11 OS=Homo sapiens OX=9606 GN=IGLV2-11 PE=1 SV=2	2	1	1	1	11	12.382	118	9.3758	1	0	1	0	1	0	11	0	1348600000	1348600000	0	674290000	674290000	0
P61626	P61626	Lysozyme C	LYZ	sp|P61626|LYSC_HUMAN Lysozyme C OS=Homo sapiens OX=9606 GN=LYZ PE=1 SV=1	1	1	1	1	8.1	16.537	148	9.2439	1	0	1	0	1	0	8.1	0	26583000	26583000	0	2416600	2416600	0
Q96IZ7	Q96IZ7	Serine/Arginine-related protein 53	RSRC1	sp|Q96IZ7|RSRC1_HUMAN Serine/Arginine-related protein 53 OS=Homo sapiens OX=9606 GN=RSRC1 PE=1 SV=1	1	1	1	1	5.4	38.677	334	8.8403	1	0	1	0	1	0	5.4	0	23043000	23043000	0	1280200	1280200	0
Q9NPA8	Q9NPA8	Transcription and mRNA export factor ENY2	ENY2	sp|Q9NPA8|ENY2_HUMAN Transcription and mRNA export factor ENY2 OS=Homo sapiens OX=9606 GN=ENY2 PE=1 SV=1	1	1	1	1	16.8	11.528	101	8.3995	1	0	1	0	1	0	16.8	0	11123000	11123000	0	1853900	1853900	0
A0A0B4J1Y9	A0A0B4J1Y9	Immunoglobulin heavy variable 3-72	IGHV3-72	sp|A0A0B4J1Y9|HV372_HUMAN Immunoglobulin heavy variable 3-72 OS=Homo sapiens OX=9606 GN=IGHV3-72 PE=3 SV=1	1	1	1	1	9.2	13.203	119	8.3874	1	0	1	0	1	0	9.2	0	372380000	372380000	0	74476000	74476000	0
P17844	P17844	Probable ATP-dependent RNA helicase DDX5	DDX5	sp|P17844|DDX5_HUMAN Probable ATP-dependent RNA helicase DDX5 OS=Homo sapiens OX=9606 GN=DDX5 PE=1 SV=1	1	1	1	1	1.3	69.147	614	7.7658	1	0	1	0	1	0	1.3	0	11074000	11074000	0	307610	307610	0
Q8TBE9	Q8TBE9	N-acylneuraminate-9-phosphatase	NANP	sp|Q8TBE9|NANP_HUMAN N-acylneuraminate-9-phosphatase OS=Homo sapiens OX=9606 GN=NANP PE=1 SV=1	1	1	1	1	3.6	27.813	248	7.7293	1	0	1	0	1	0	3.6	0	2702500000	2702500000	0	193040000	193040000	0
P38919	P38919	Eukaryotic initiation factor 4A-III	EIF4A3	sp|P38919|IF4A3_HUMAN Eukaryotic initiation factor 4A-III OS=Homo sapiens OX=9606 GN=EIF4A3 PE=1 SV=4	1	1	1	1	3.2	46.871	411	7.4	1	0	1	0	1	0	3.2	0	0	0	0	0	0	0
P59666;P59665	P59666;P59665	Neutrophil defensin 3;Neutrophil defensin 1	DEFA3;DEFA1B	sp|P59666|DEF3_HUMAN Neutrophil defensin 3 OS=Homo sapiens OX=9606 GN=DEFA3 PE=1 SV=1;sp|P59665|DEF1_HUMAN Neutrophil defensin 1 OS=Homo sapiens OX=9606 GN=DEFA1B PE=1 SV=1	2	1	1	1	10.6	10.245	94	7.2412	1	0	1	0	1	0	10.6	0	0	0	0	0	0	0
Q96DR7	Q96DR7	Rho guanine nucleotide exchange factor 26	ARHGEF26	sp|Q96DR7|ARHGQ_HUMAN Rho guanine nucleotide exchange factor 26 OS=Homo sapiens OX=9606 GN=ARHGEF26 PE=1 SV=4	1	1	1	1	1.6	97.344	871	6.9318	1	0	1	0	1	0	1.6	0	405470000	405470000	0	8109500	8109500	0
Q96PV0	Q96PV0	Ras/Rap GTPase-activating protein SynGAP	SYNGAP1	sp|Q96PV0|SYGP1_HUMAN Ras/Rap GTPase-activating protein SynGAP OS=Homo sapiens OX=9606 GN=SYNGAP1 PE=1 SV=4	1	1	1	1	1.1	148.28	1343	6.6726	1	0	1	0	1	0	1.1	0	5507700000	5507700000	0	66358000	66358000	0
Q02413	Q02413	Desmoglein-1	DSG1	sp|Q02413|DSG1_HUMAN Desmoglein-1 OS=Homo sapiens OX=9606 GN=DSG1 PE=1 SV=2	1	1	1	1	1.7	113.75	1049	6.624	1	0	1	0	1	0	1.7	0	16919000	16919000	0	384520	384520	0
P16403	P16403	Histone H1.2	H1-2	sp|P16403|H12_HUMAN Histone H1.2 OS=Homo sapiens OX=9606 GN=H1-2 PE=1 SV=2	1	8	1	1	39.4	21.364	213	6.5154	6	5	1	0	1	0	39.4	19.2	36710000	36710000	0	3059200	3059200	0
Q96GM5	Q96GM5	SWI/SNF-related matrix-associated actin-dependent regulator of chromatin subfamily D member 1	SMARCD1	sp|Q96GM5|SMRD1_HUMAN SWI/SNF-related matrix-associated actin-dependent regulator of chromatin subfamily D member 1 OS=Homo sapiens OX=9606 GN=SMARCD1 PE=1 SV=2	1	1	1	1	2.9	58.232	515	6.5014	1	0	1	0	1	0	2.9	0	15559000	15559000	0	471480	471480	0
P02765	P02765	Alpha-2-HS-glycoprotein	AHSG	sp|P02765|FETUA_HUMAN Alpha-2-HS-glycoprotein OS=Homo sapiens OX=9606 GN=AHSG PE=1 SV=2	1	1	1	1	3.3	39.34	367	6.4239	1	0	1	0	1	0	3.3	0	0	0	0	0	0	0
Q13427	Q13427	Peptidyl-prolyl cis-trans isomerase G	PPIG	sp|Q13427|PPIG_HUMAN Peptidyl-prolyl cis-trans isomerase G OS=Homo sapiens OX=9606 GN=PPIG PE=1 SV=2	1	1	1	1	2.4	88.616	754	6.4058	1	0	1	0	1	0	2.4	0	15510000	15510000	0	484670	484670	0
P09429	P09429	High mobility group protein B1	HMGB1	sp|P09429|HMGB1_HUMAN High mobility group protein B1 OS=Homo sapiens OX=9606 GN=HMGB1 PE=1 SV=3	1	1	1	1	7.4	24.893	215	6.3853	1	0	1	0	1	0	7.4	0	19269000	19269000	0	1926900	1926900	0
Q9UQ35	Q9UQ35	Serine/arginine repetitive matrix protein 2	SRRM2	sp|Q9UQ35|SRRM2_HUMAN Serine/arginine repetitive matrix protein 2 OS=Homo sapiens OX=9606 GN=SRRM2 PE=1 SV=2	1	1	1	1	0.5	299.61	2752	6.306	1	0	1	0	1	0	0.5	0	21915000	21915000	0	136970	136970	0
P69905	P69905	Hemoglobin subunit alpha	HBA2	sp|P69905|HBA_HUMAN Hemoglobin subunit alpha OS=Homo sapiens OX=9606 GN=HBA2 PE=1 SV=2	1	1	1	1	11.3	15.257	142	6.2908	1	0	1	0	1	0	11.3	0	20087000	20087000	0	2510900	2510900	0
Q9H3D4	Q9H3D4	Tumor protein 63	TP63	sp|Q9H3D4|P63_HUMAN Tumor protein 63 OS=Homo sapiens OX=9606 GN=TP63 PE=1 SV=1	1	1	1	1	1.9	76.785	680	6.2661	1	0	1	0	1	0	1.9	0	26850000	26850000	0	789720	789720	0
Q99665	Q99665	Interleukin-12 receptor subunit beta-2	IL12RB2	sp|Q99665|I12R2_HUMAN Interleukin-12 receptor subunit beta-2 OS=Homo sapiens OX=9606 GN=IL12RB2 PE=1 SV=1	1	1	1	1	0.7	97.134	862	6.211	1	0	1	0	1	0	0.7	0	0	0	0	0	0	0
P01876;P01877	P01876;P01877	Immunoglobulin heavy constant alpha 1;Immunoglobulin heavy constant alpha 2	IGHA1;IGHA2	sp|P01876|IGHA1_HUMAN Immunoglobulin heavy constant alpha 1 OS=Homo sapiens OX=9606 GN=IGHA1 PE=1 SV=2;sp|P01877|IGHA2_HUMAN Immunoglobulin heavy constant alpha 2 OS=Homo sapiens OX=9606 GN=IGHA2 PE=1 SV=4	2	1	1	1	9.1	37.654	353	6.1367	1	0	1	0	1	0	9.1	0	4616800	4616800	0	271580	271580	0
A0A0C4DH31;P23083	A0A0C4DH31;P23083	Immunoglobulin heavy variable 1-18;Immunoglobulin heavy variable 1-2	IGHV1-18;IGHV1-2	sp|A0A0C4DH31|HV118_HUMAN Immunoglobulin heavy variable 1-18 OS=Homo sapiens OX=9606 GN=IGHV1-18 PE=3 SV=1;sp|P23083|HV102_HUMAN Immunoglobulin heavy variable 1-2 OS=Homo sapiens OX=9606 GN=IGHV1-2 PE=1 SV=2	2	1	1	1	9.4	12.82	117	6.1343	1	0	1	0	1	0	9.4	0	4673400	4673400	0	934680	934680	0
Q5T5Y3	Q5T5Y3	Calmodulin-regulated spectrin-associated protein 1	CAMSAP1	sp|Q5T5Y3|CAMP1_HUMAN Calmodulin-regulated spectrin-associated protein 1 OS=Homo sapiens OX=9606 GN=CAMSAP1 PE=1 SV=2	1	1	1	1	1.6	177.97	1602	6.1081	1	0	1	0	1	0	1.6	0	68566000	68566000	0	659290	659290	0
P62807;Q99880;Q93079;Q99877;P58876;Q5QNW6;Q99879;Q16778;P33778;P23527;Q96A08;A0A2R8Y619	P62807;Q99880;Q93079;Q99877;P58876;Q5QNW6;Q99879;Q16778;P33778;P23527;Q96A08	Histone H2B type 1-C/E/F/G/I;Histone H2B type 1-L;Histone H2B type 1-H	H2BC10;H2BC13;	sp|P62807|H2B1C_HUMAN Histone H2B type 1-C/E/F/G/I OS=Homo sapiens OX=9606 GN=H2BC10 PE=1 SV=4;sp|Q99880|H2B1L_HUMAN Histone H2B type 1-L OS=Homo sapiens OX=9606 GN=H2BC13 PE=1 SV=3;sp|Q93079|H2B1H_HUMAN Histone H2B type 1-H OS=Homo sapiens OX=9606 GN=H2BC	12	8	1	0	60.3	13.906	126	5.9884	4	7	1	0	0	0	44.4	56.3	9959500	9959500	0	905410	905410	0
Q9UJC3	Q9UJC3	Protein Hook homolog 1	HOOK1	sp|Q9UJC3|HOOK1_HUMAN Protein Hook homolog 1 OS=Homo sapiens OX=9606 GN=HOOK1 PE=1 SV=2	1	1	1	1	1.6	84.647	728	5.967	1	0	1	0	1	0	1.6	0	0	0	0	0	0	0
Q9NY12	Q9NY12	H/ACA ribonucleoprotein complex subunit 1	GAR1	sp|Q9NY12|GAR1_HUMAN H/ACA ribonucleoprotein complex subunit 1 OS=Homo sapiens OX=9606 GN=GAR1 PE=1 SV=1	1	1	1	1	6	22.348	217	5.9151	1	0	1	0	1	0	6	0	9597300	9597300	0	738250	738250	0
Q2VIQ3	Q2VIQ3	Chromosome-associated kinesin KIF4B	KIF4B	sp|Q2VIQ3|KIF4B_HUMAN Chromosome-associated kinesin KIF4B OS=Homo sapiens OX=9606 GN=KIF4B PE=2 SV=2	1	1	1	1	0.7	140.03	1234	5.9149	1	0	1	0	1	0	0.7	0	12605000	12605000	0	185370	185370	0
Q92887	Q92887	ATP-binding cassette sub-family C member 2	ABCC2	sp|Q92887|MRP2_HUMAN ATP-binding cassette sub-family C member 2 OS=Homo sapiens OX=9606 GN=ABCC2 PE=1 SV=3	1	1	1	1	0.6	174.21	1545	5.8972	1	0	1	0	1	0	0.6	0	245250000	245250000	0	3660400	3660400	0
Q9UPN3	Q9UPN3	Microtubule-actin cross-linking factor 1, isoforms 1/2/3/4/5	MACF1	sp|Q9UPN3|MACF1_HUMAN Microtubule-actin cross-linking factor 1, isoforms 1/2/3/4/5 OS=Homo sapiens OX=9606 GN=MACF1 PE=1 SV=4	1	1	1	1	0.2	838.3	7388	5.893	1	0	1	0	1	0	0.2	0	134760000	134760000	0	282520	282520	0
Q9Y2D2	Q9Y2D2	UDP-N-acetylglucosamine transporter	SLC35A3	sp|Q9Y2D2|S35A3_HUMAN UDP-N-acetylglucosamine transporter OS=Homo sapiens OX=9606 GN=SLC35A3 PE=1 SV=1	1	1	1	1	6.8	35.984	325	5.8287	1	0	1	0	1	0	6.8	0	78897000	78897000	0	5259800	5259800	0
Q9P1A2	Q9P1A2	Putative serine/threonine-protein phosphatase 4 regulatory subunit 1-like	PPP4R1L	sp|Q9P1A2|PP4RL_HUMAN Putative serine/threonine-protein phosphatase 4 regulatory subunit 1-like OS=Homo sapiens OX=9606 GN=PPP4R1L PE=5 SV=3	1	1	1	1	3.4	45.907	415	5.8264	1	0	1	0	1	0	3.4	0	0	0	0	0	0	0
Q8TA86	Q8TA86	Retinitis pigmentosa 9 protein	RP9	sp|Q8TA86|RP9_HUMAN Retinitis pigmentosa 9 protein OS=Homo sapiens OX=9606 GN=RP9 PE=1 SV=2	1	1	1	1	5.4	26.106	221	5.7933	1	0	1	0	1	0	5.4	0	10111000	10111000	0	722250	722250	0
Q13496	Q13496	Myotubularin	MTM1	sp|Q13496|MTM1_HUMAN Myotubularin OS=Homo sapiens OX=9606 GN=MTM1 PE=1 SV=2	1	1	1	1	2.8	69.931	603	5.7879	1	0	1	0	1	0	2.8	0	24943000	24943000	0	593890	593890	0
P62899	P62899	60S ribosomal protein L31	RPL31	sp|P62899|RL31_HUMAN 60S ribosomal protein L31 OS=Homo sapiens OX=9606 GN=RPL31 PE=1 SV=1	1	1	1	1	7.2	14.463	125	5.7808	1	0	1	0	1	0	7.2	0	90925000	90925000	0	12989000	12989000	0
Q8N961	Q8N961	Ankyrin repeat and BTB/POZ domain-containing protein 2	ABTB2	sp|Q8N961|ABTB2_HUMAN Ankyrin repeat and BTB/POZ domain-containing protein 2 OS=Homo sapiens OX=9606 GN=ABTB2 PE=2 SV=2	1	1	1	1	0.9	113.65	1025	5.7739	1	0	1	0	1	0	0.9	0	28494000	28494000	0	527660	527660	0
Q7Z412	Q7Z412	Peroxisome assembly protein 26	PEX26	sp|Q7Z412|PEX26_HUMAN Peroxisome assembly protein 26 OS=Homo sapiens OX=9606 GN=PEX26 PE=1 SV=2	1	1	1	1	2.3	33.898	305	5.7446	1	0	1	0	1	0	2.3	0	45236000	45236000	0	2513100	2513100	0
Q9H0H5	Q9H0H5	Rac GTPase-activating protein 1	RACGAP1	sp|Q9H0H5|RGAP1_HUMAN Rac GTPase-activating protein 1 OS=Homo sapiens OX=9606 GN=RACGAP1 PE=1 SV=1	1	1	1	1	1.1	71.026	632	5.7299	1	0	1	0	1	0	1.1	0	0	0	0	0	0	0
P21854	P21854	B-cell differentiation antigen CD72	CD72	sp|P21854|CD72_HUMAN B-cell differentiation antigen CD72 OS=Homo sapiens OX=9606 GN=CD72 PE=1 SV=1	1	1	1	1	4.5	40.22	359	5.7228	1	0	1	0	1	0	4.5	0	87343000	87343000	0	4597000	4597000	0
Q14667	Q14667	Protein KIAA0100	KIAA0100	sp|Q14667|K0100_HUMAN Protein KIAA0100 OS=Homo sapiens OX=9606 GN=KIAA0100 PE=1 SV=3	1	1	1	1	0.4	253.7	2235	5.7051	1	0	1	0	1	0	0.4	0	4146200000	4146200000	0	35743000	35743000	0
Q9NR30	Q9NR30	Nucleolar RNA helicase 2	DDX21	sp|Q9NR30|DDX21_HUMAN Nucleolar RNA helicase 2 OS=Homo sapiens OX=9606 GN=DDX21 PE=1 SV=5	1	1	1	1	2.8	87.343	783	5.7039	1	0	1	0	1	0	2.8	0	8104400	8104400	0	188470	188470	0
P07199	P07199	Major centromere autoantigen B	CENPB	sp|P07199|CENPB_HUMAN Major centromere autoantigen B OS=Homo sapiens OX=9606 GN=CENPB PE=1 SV=2	1	1	1	1	3.2	65.171	599	5.6638	1	0	1	0	1	0	3.2	0	22600000	22600000	0	941690	941690	0
A8MYZ6	A8MYZ6	Forkhead box protein O6	FOXO6	sp|A8MYZ6|FOXO6_HUMAN Forkhead box protein O6 OS=Homo sapiens OX=9606 GN=FOXO6 PE=1 SV=1	1	1	1	1	3.7	50.594	492	5.6585	1	0	1	0	1	0	3.7	0	1427600000	1427600000	0	83976000	83976000	0
Q06210	Q06210	Glutamine--fructose-6-phosphate aminotransferase [isomerizing] 1	GFPT1	sp|Q06210|GFPT1_HUMAN Glutamine--fructose-6-phosphate aminotransferase [isomerizing] 1 OS=Homo sapiens OX=9606 GN=GFPT1 PE=1 SV=3	1	1	1	1	1.4	78.806	699	5.6583	1	0	1	0	1	0	1.4	0	0	0	0	0	0	0
Q15785	Q15785	Mitochondrial import receptor subunit TOM34	TOMM34	sp|Q15785|TOM34_HUMAN Mitochondrial import receptor subunit TOM34 OS=Homo sapiens OX=9606 GN=TOMM34 PE=1 SV=2	1	1	1	1	4.2	34.559	309	5.6522	1	0	1	0	1	0	4.2	0	29095000	29095000	0	1385500	1385500	0
Q9NQ29	Q9NQ29	Putative RNA-binding protein Luc7-like 1	LUC7L	sp|Q9NQ29|LUC7L_HUMAN Putative RNA-binding protein Luc7-like 1 OS=Homo sapiens OX=9606 GN=LUC7L PE=1 SV=1	1	5	1	1	13.2	43.727	371	5.6496	5	0	1	0	1	0	13.2	0	7586900	7586900	0	379340	379340	0
Q9NZS9	Q9NZS9	Bifunctional apoptosis regulator	BFAR	sp|Q9NZS9|BFAR_HUMAN Bifunctional apoptosis regulator OS=Homo sapiens OX=9606 GN=BFAR PE=1 SV=1	1	1	1	1	2.9	52.737	450	5.647	1	0	1	0	1	0	2.9	0	0	0	0	0	0	0
Q96KP6	Q96KP6	TNFAIP3-interacting protein 3	TNIP3	sp|Q96KP6|TNIP3_HUMAN TNFAIP3-interacting protein 3 OS=Homo sapiens OX=9606 GN=TNIP3 PE=1 SV=2	1	1	1	1	3.1	38.943	325	5.6462	1	0	1	0	1	0	3.1	0	14863000	14863000	0	743150	743150	0
A1KZ92	A1KZ92	Probable oxidoreductase PXDNL	PXDNL	sp|A1KZ92|PXDNL_HUMAN Probable oxidoreductase PXDNL OS=Homo sapiens OX=9606 GN=PXDNL PE=1 SV=3	1	1	1	1	1	163.68	1463	5.645	1	0	1	0	1	0	1	0	27072000	27072000	0	307630	307630	0
A0A075B6J2	A0A075B6J2	Probable non-functional immunoglobulin lambda variable 2-33	IGLV2-33	sp|A0A075B6J2|LV233_HUMAN Probable non-functional immunoglobulin lambda variable 2-33 OS=Homo sapiens OX=9606 GN=IGLV2-33 PE=1 SV=2	1	1	1	1	7.6	12.686	118	5.6338	1	0	1	0	1	0	7.6	0	41115000	41115000	0	8223000	8223000	0
Q8WTR8	Q8WTR8	Netrin-5	NTN5	sp|Q8WTR8|NET5_HUMAN Netrin-5 OS=Homo sapiens OX=9606 GN=NTN5 PE=2 SV=2	1	1	1	1	3.1	53.173	489	5.6326	1	0	1	0	1	0	3.1	0	57427000	57427000	0	2051000	2051000	0
P15880	P15880	40S ribosomal protein S2	RPS2	sp|P15880|RS2_HUMAN 40S ribosomal protein S2 OS=Homo sapiens OX=9606 GN=RPS2 PE=1 SV=2	1	1	1	1	3.8	31.324	293	5.6302	1	0	1	0	1	0	3.8	0	72211000	72211000	0	3282300	3282300	0
Q9UIL4	Q9UIL4	Kinesin-like protein KIF25	KIF25	sp|Q9UIL4|KIF25_HUMAN Kinesin-like protein KIF25 OS=Homo sapiens OX=9606 GN=KIF25 PE=2 SV=2	1	1	1	1	2.1	40.686	384	5.6292	1	0	1	0	1	0	2.1	0	3675200000	3675200000	0	159790000	159790000	0
Q9BYJ9	Q9BYJ9	YTH domain-containing family protein 1	YTHDF1	sp|Q9BYJ9|YTHD1_HUMAN YTH domain-containing family protein 1 OS=Homo sapiens OX=9606 GN=YTHDF1 PE=1 SV=1	1	1	1	1	1.8	60.873	559	-2	1	0	1	0	1	0	1.8	0	17168000	17168000	0	746430	746430	0
Q6ZUK4	Q6ZUK4	Transmembrane protein 26	TMEM26	sp|Q6ZUK4|TMM26_HUMAN Transmembrane protein 26 OS=Homo sapiens OX=9606 GN=TMEM26 PE=1 SV=1	1	1	1	1	2.2	41.671	368	-2	1	0	1	0	1	0	2.2	0	46337000	46337000	0	2574300	2574300	0
