# Supplementary material for: TRIM21-mediated ubiquitination of PARP1 suppresses small cell lung cancer progression through the PI3K/AKT/STAT5A axis
Source: Research Square preprint supplement (doi:10.21203/rs.3.rs-5464073/v1), 2024-12-05
Supplement: Supplementary file 3 [file b77e5dafc120ef5c9de6474e.xlsx]

## Sheet: Sheet1
Table S2. Antibodies and chemical compounds used in the study
Reagent	Reagent	Source	Apply	Identifier
Antibody	PARP1	Active Motif	IP, WB, IHC	Cat#: 39559; RRID: AB_2793257
Antibody	PARP1	GeneTex	IF, PLA	Cat#: GTX632388; RRID: AB_2888311
Antibody	TRIM21	Cell Signaling	WB, IHC	Cat#: 92043
Antibody	TRIM21	Abcam	IF, PLA	Cat#: ab207728
Antibody	AKT	Cell Signaling	WB	Cat#: 9272
Antibody	p-AKT (Ser473)	Cell Signaling	WB, IHC	Cat#: 4060
Antibody	STAT5A	Abcam	WB, ChIP	Cat#: ab32043
Antibody	p-STAT5A (Tyr694)	Abcam	WB, IHC	Cat#: ab106095
Antibody	GFP-Tag	Abcam	IP, WB	Cat#: ab290; RRID: AB_567807
Antibody	Flag-Tag	Cell Signaling	IP, WB	Cat#: 14793S; RRID: AB_2572291
Antibody	Ubiquitin	Cell Signaling	WB	Cat#: 3936S; RRID: AB_331292
Antibody	Myc-Tag	Cell Signaling	WB	Cat#: 2276S; RRID: AB_331783
Antibody	GST-Tag	Affinity	WB	Cat#: T0007; RRID: AB_2839414
Antibody	Phospho-Histone H2A.X	Cell Signaling	IF	Cat#: 2577S; RRID: AB_2118010
Antibody	Phospho-Histone H2A.X	Cell Signaling	IHC	Cat#: 80312; RRID: AB_2799949
Antibody	p-ChK1	Cell Signaling	WB	Cat#: 12302S; RRID: AB_2783865
Antibody	ChK1		WB	Cat#: 2360S; RRID: AB_2080320
Antibody	RPA32	Cell Signaling	WB	Cat#: 35869S; RRID: AB_2799086
Antibody	p-RPA32	Cell Signaling	WB	Cat#: 83745S; RRID: AB_2800029
Antibody	Ki67	Cell Signaling	IHC	Cat#: 12202S; RRID: AB_2620142
Antibody	β-Actin	Affinity	WB	Cat#: T0022; RRID: AB_2839417
Antibody	HA	Affinity	WB	Cat#: T0008; RRID: AB_2839415
Antibody	Tubulin	Affinity	WB	Cat#: T0023; RRID: AB_2813772
Antibody	His-Tag	Affinity	WB	Cat#: T0009; RRID: AB_2839416
Antibody	Goat Anti-Rabbit IgG	Elabscience	IP	Cat#: E-AB-1034
Antibody	Goat Anti-Rabbit IgG (H+L) (AF488 conjugated)	Elabscience	IF	Cat#: E-AB-1055
Antibody	Goat Anti-Rabbit IgG (H+L) (AF647 conjugated)	Elabscience	IF	Cat#: E-AB-1076
Antibody	Goat Anti-Rabbit IgG (H+L) (peroxidase/HRP conjugated)	Elabscience	WB	Cat#: E-AB-1003
Antibody	Goat Anti-Mouse IgG(H+L) (peroxidase/HRP conjugated)	Elabscience	WB	Cat#: E-AB-1001
Antibody	IPKine™ HRP, Mouse Anti-Rabbit IgG LCS	Abbkine	WB	Cat#: A25022
Antibody	IPKine™ HRP, Goat Anti-Mouse IgG LCS	Abbkine	WB	Cat#: A25012
Chemical compound, drug	PF-05212384 (PKI-587)	GlpBio Technology Inc		GC15653
Chemical compound	Dimethyl sulfoxide (DMSO)	GlpBio Technology Inc		GK12002
Chemical compound, drug	Cycloheximide (CHX)	GlpBio Technology Inc		GC17198
Chemical compound, drug	Etoposide	GlpBio Technology Inc		GC15617
Chemical compound, drug	Talazoparib (BMN673)	GlpBio Technology Inc		GC15932
Chemical compound, drug	Camptothecin	GlpBio Technology Inc		GC15439
Chemical compound, drug	SC-79	GlpBio Technology Inc		GC11645
Chemical compound, drug	GDC-0068	GlpBio Technology Inc		GC11214
Chemical compound, drug	BEZ235	GlpBio Technology Inc		GC10060
Chemical compound	H2O2	GlpBio Technology Inc		GC26183
Chemical compound	IPTG (Isopropyl β-D-thiogalactoside)	GlpBio Technology Inc		GC30002
Chemical compound, drug	MG-132	GlpBio Technology Inc		GC10383
Chemical compound, drug	Hygromycin B	GlpBio Technology Inc		GC15496
Chemical compound	Tween 80	GlpBio Technology Inc		GC30059
Chemical compound	PEG300	GlpBio Technology Inc		GC30022
Chemical compound, drug	polybrene	GlpBio Technology Inc		GC19206
Chemical compound, drug	puromycin	GlpBio Technology Inc		GC16384
Chemical compound, drug	doxycycline	GlpBio Technology Inc		GC63621
Chemical compound	DAPI	GlpBio Technology Inc		GC43378
Beads	Protein G magnetic beads	Sigma-Aldrich (Saint Louis, MO, USA)		10003D
Beads	Protein A/G magnetic beads	Sigma-Aldrich (Saint Louis, MO, USA)		80105G
